# Supplementary material for: Absolute configuration retention of a configurationally labile ligand during dynamic processes of thiolate protected gold clusters
Source: Royal Society of Chemistry journal article supplement (doi:10.1039/d1sc01702k), 2021-01-01
Supplement: d1sc01702k1.pdf [file d1sc01702k1.pdf]

## Supporting Information

### Absolute configuration retention of a configurationally labile ligand during dynamic processes of thiolate protected gold cluster

Yanan Wang<sup>[a]</sup>, Esko Makkonen<sup>[b]</sup>, Xi Chen<sup>[b]\*</sup>, Thomas Bürgi<sup>[a]\*</sup>

**Abstract:** Monolayer protected metal clusters are dynamic nanoscale objects. For example, the chiral  $\text{Au}_{38}(\text{2-PET})_{24}$  (2-PET: 2-phenylethylthiolate) racemizes at moderate temperature. In addition, ligands and metal atoms can easily exchange between clusters. Such processes are important for applications of monolayer protected metal clusters, however, the mechanistic study of such processes turns out to be challenging. Here we use a configurationally labile axial chiral ligand, biphenyl-2,2'-dithiol (R/S-BiDi), as a probe to study dynamic cluster processes. It is shown that the ligand exchange of free R/S-BiDi on a chiral  $\text{Au}_{38}(\text{2-PET})_{24}$  cluster is diastereospecific. Using chiral chromatography, isolated single diastereomers of the type Anti-clock/Clock- $\text{Au}_{38}(\text{2-PET})_{22}(\text{R/S-BiDi})_1$  could be isolated. Upon heating the cluster framework racemizes, whereas the R/S-BiDi ligand does not. This finding demonstrates that during the dynamic cluster processes involved, cluster racemization and/or ligand exchange between clusters, the R/S-BiDi ligand is sufficiently confined thus preventing its racemization, and excludes the possibility that the ligand desorbs from the cluster surface.

## Experimental Procedures

All chemicals were purchased from commercial suppliers and used as received without any further treatment. Biphenyl-2,2'-dithiol (BiDi) was synthesized from the biphenyl-2,2'-diol following the protocol for synthesis of BINAS reported before.<sup>1</sup> The synthesis and size selection of rac-Au<sub>38</sub>(2-PET)<sub>24</sub> was done according to previous work,<sup>2</sup> and the separation of the two enantiomers of Au<sub>38</sub>(2-PET)<sub>24</sub> was done using chiral HPLC.<sup>3</sup>

**Ligand exchange reactions with free BiDi.** Purified rac-Au<sub>38</sub>(2-PET)<sub>24</sub>, A-Au<sub>38</sub>(2-PET)<sub>24</sub> and C-Au<sub>38</sub>(2-PET)<sub>24</sub>, respectively were mixed with BiDi in toluene (cluster concentration 1mg/mL) at a molar ratio of cluster to free ligand of 1:50.<sup>3, 4</sup> Ligand exchange was performed at room temperature. After reaction, the solution was concentrated and immediately passed over a size-exclusion column to remove the free ligands. The collected product was then ready for use in the HPLC experiments.

**Thermal treatment of Au<sub>38</sub>.** The collected Au<sub>38</sub> clusters with one BiDi in its ligand shell was concentrated to 10 mg/mL, heated in an oil bath to 70°C, and injected to HPLC after various times.

**HPL Chromatography.** Chiral HPLC was performed on a JASCO 20XX HPLC system equipped with a semi-preparative Phenomenex Lux-5u-cellulose-1 column (5µm, 250 x 10 mm). The sample was injected in toluene and eluted with n-hexane/iso-propanol 75:25 at a flow rate of 2.5mL/min. A JASCO 2070 plus UV-vis detector was used for the detection.

**UV-vis and CD Spectroscopy.** UV-vis spectra were measured on a Varian Cary 50 spectrometer. A quartz cuvette of 2mm path length was used. CD spectra were recorded at the same conditions on a JASCO J-815 CD-spectrometer. For each CD spectrum ten scans were averaged at a scanning speed of 200nm/min with a data pitch of 1 nm. The anisotropy factors  $g = \theta[mdeg]/(32980 \times A)^2$  were calculated from the UV-vis and CD spectra.

**MALDI-TOF-MS.** Mass spectra were recorded on a Bruker Autoflex mass spectrometer in positive linear mode with a nitrogen laser at near-threshold laser intensity. As matrix trans-2-[3-(4-tert-butylphenyl)-2-methyl-2-propenylidene]-malononitrile was used. 3.5mg matrix was dissolved in 100 µl toluene. Matrix and sample were mixed at volume ratio 1:1, and 2µl of the mixture was applied to the MALDI plate and air-dried.

**Density Functional Theory (DFT) Calculations.** In this work, we applied the GPAW software package<sup>5</sup> to do all the calculations. PBE functional<sup>6, 7</sup> was used for the exchange-correlation energy, and the van der Waals interactions were described by the Tkatchenko-Scheffler model.<sup>8</sup> The clusters and ligand molecules were placed into a rectangle unit cell with a 8 Å vacuum extension in each dimension from the edge of the molecule or the cluster. Per atom, the electronic configuration of valence electrons is H(1s<sub>1</sub>), C(2s<sub>2</sub> 2p<sub>2</sub>), S(3s<sub>2</sub> 3p<sub>4</sub>) and Ag(4d<sub>10</sub> 5s<sub>1</sub>). The remaining electrons were treated as a frozen core. The default PAW dataset package 0.9.20000 was used for all the atoms. The 2-PET ligands were replaced by HSCH<sub>3</sub> in all the calculations.

The structure optimizations were done using the GPAW grid mode. The real-spacing was chosen as  $h=0.2$  Å. For geometry optimizations, the geometry was considered to be converged when the maximum residual force was below 0.05 eV/Å. The racemization energy barrier of BiDi molecule was calculated by the nudged elastic band (NEB) method.<sup>9</sup> The barrier was computed by PBE+TS.<sup>10, 11</sup>

The CD spectra were simulated by the real-time-propagation time-dependent density functional theory (RT-TDDFT) method implemented in GPAW with localized basis sets (LCAO).<sup>12</sup> In the LCAO

mode, the default GPAW double-zeta polarized (dzp) basis sets were used for C, H, S, while the optimized double-zeta basis set (so-called "p-valence" basis set) was used for Ag atoms. The real-spacing  $h=0.3$  and vacuum size  $8 \text{ \AA}$  were chosen for the RT-TDDFT calculations. The XYZ coordinates of all the structures mentioned in this study are included in the supporting information.

## Supporting figures

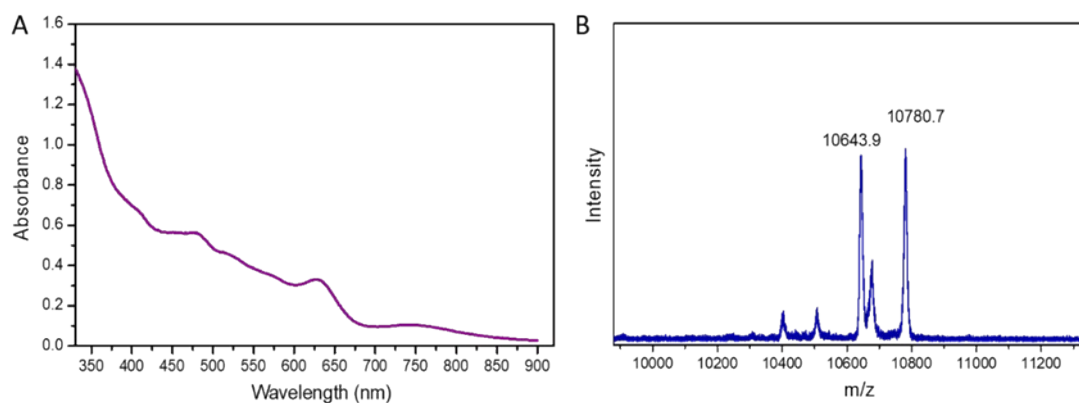

**Figure S1.** Characterization of  $\text{rac-Au}_{38}(\text{2-PET})_{24}$ . (A) UV-vis spectrum of  $\text{Rac-Au}_{38}(\text{2-PET})_{24}$ ; (B) MALDI-TOF spectrum. The signal at 10780.7 corresponds to  $\text{Au}_{38}(\text{2-PET})_{24}$  (calculated mass 10778.4), the signal at 10643.9 corresponds to  $\text{Au}_{38}(\text{2-PET})_{23}$  (loss of one 2-PET ligand, calculated mass 10641.2).

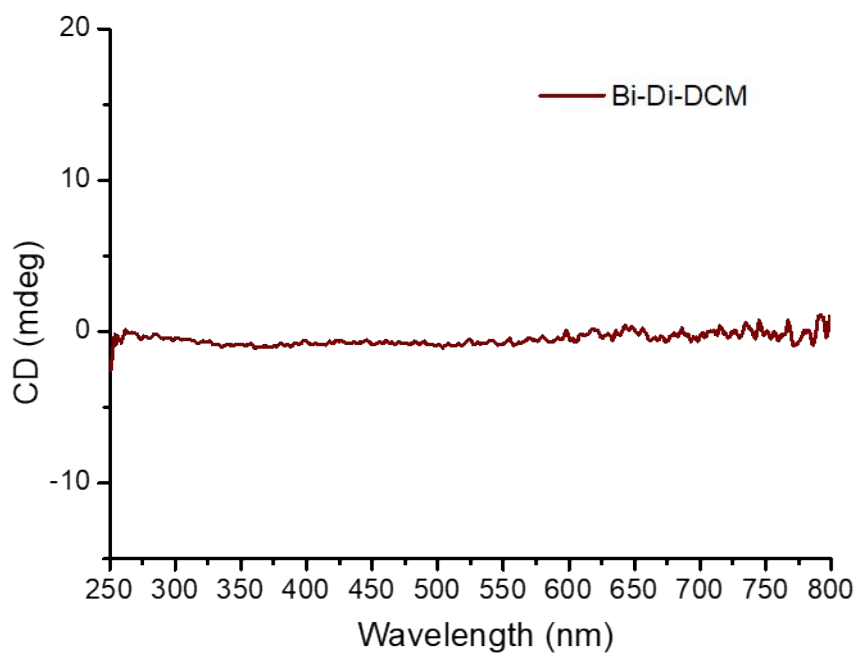

**Figure S2.** CD spectrum of BiDi dissolved in dichloromethane.

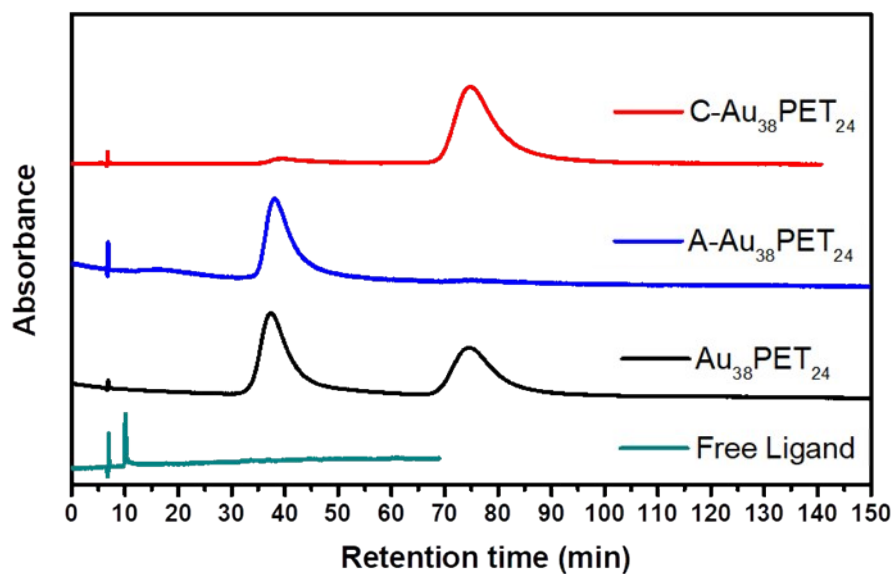

**Figure S3.** HPL Chromatogram of  $\text{rac-Au}_{38}(\text{2-PET})_{24}$  (black),  $\text{A-Au}_{38}(\text{2-PET})_{24}$  (blue),  $\text{C-Au}_{38}(\text{2-PET})_{24}$  (red), and free ligand Bi-Di (green). The peak with retention time at 6.9min is the toluene injection peak.

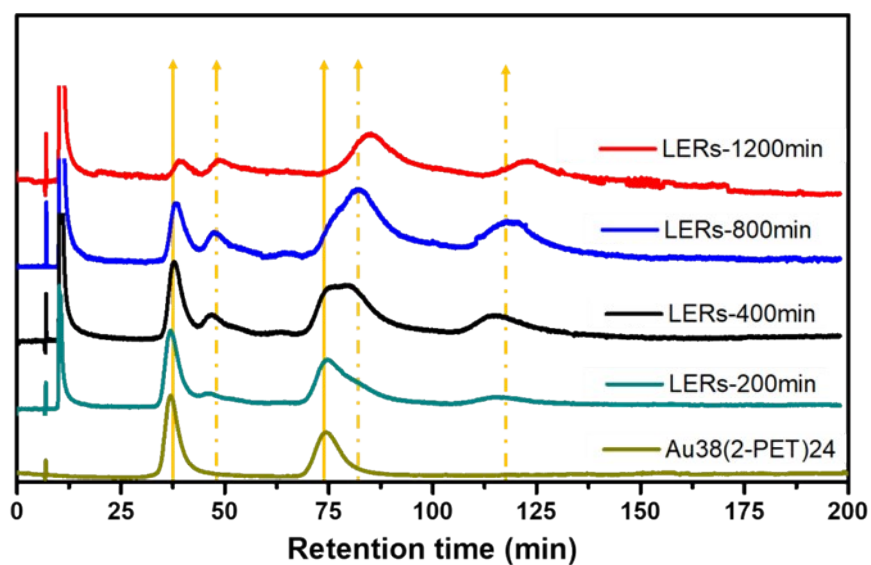

**Figure S4.** HPL Chromatograms during ligand exchange reaction between  $\text{rac-Au}_{38}(\text{2-PET})_{24}$  and BiDi. The sample was put at room temperature and the chromatogram was recorded every 200 minutes. Solid arrows indicate the two enantiomers of  $\text{Au}_{38}(\text{2-PET})_{24}$  and dashed arrows indicate the new peaks.

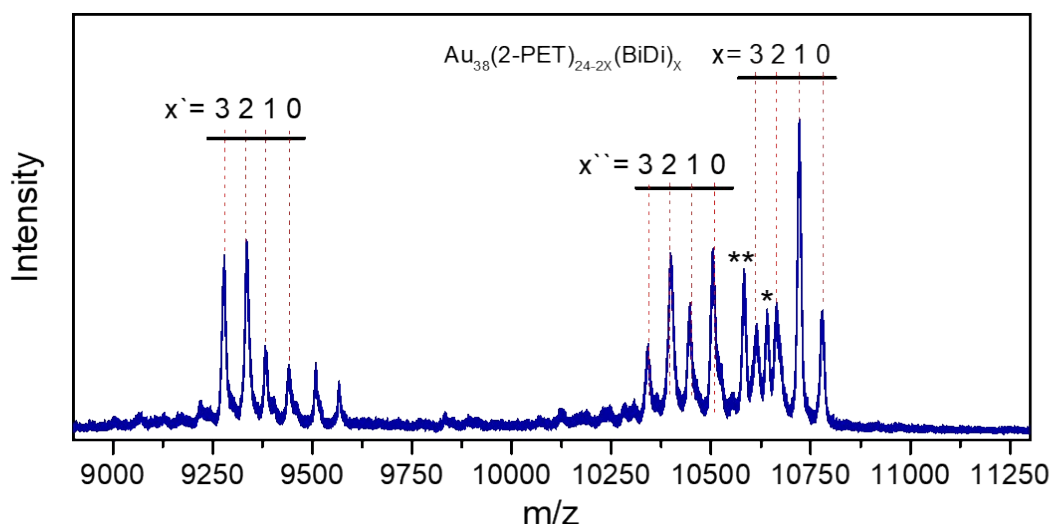

**Figure S5.** MALDI-TOF spectrum of reaction mixture of ligand exchange reaction between  $\text{rac-Au}_{38}(\text{2-PET})_{24}$  and BiDi at room temperature. The sample was collected after 18 hours. The  $\text{Au}_{38}(\text{2-PET})_{24-2x}(\text{BiDi})_x$  species are marked with different values of  $x$ , and the related fragments  $\text{Au}_{34}(\text{2-PET})_{20-2x}(\text{BiDi})_x$  after release of  $\text{Au}_4(\text{2-PET})_4$  are also visible, for example the signal at 9442.1 ( $x'=0$ ) corresponds to  $\text{Au}_{34}(\text{2-PET})_{20}$  (calculated mass 9441.5). In addition, the fragment  $\text{Au}_{38}(\text{2-PET})_{22-2x}(\text{BiDi})_x$  after release two 2-PET ligands are also marked, for example the signal at 10506.6 ( $x''=0$ ) corresponds to  $\text{Au}_{38}(\text{2-PET})_{22}$  (calculated mass 10503.9). The signal at 10641.28 (\*) corresponds to  $\text{Au}_{38}(\text{2-PET})_{23}$  (calculated mass 10641.15), the signal at 10583.26 (\*\*) corresponds to  $\text{Au}_{37}(\text{2-PET})_{24}$  (calculated mass 10581.41).

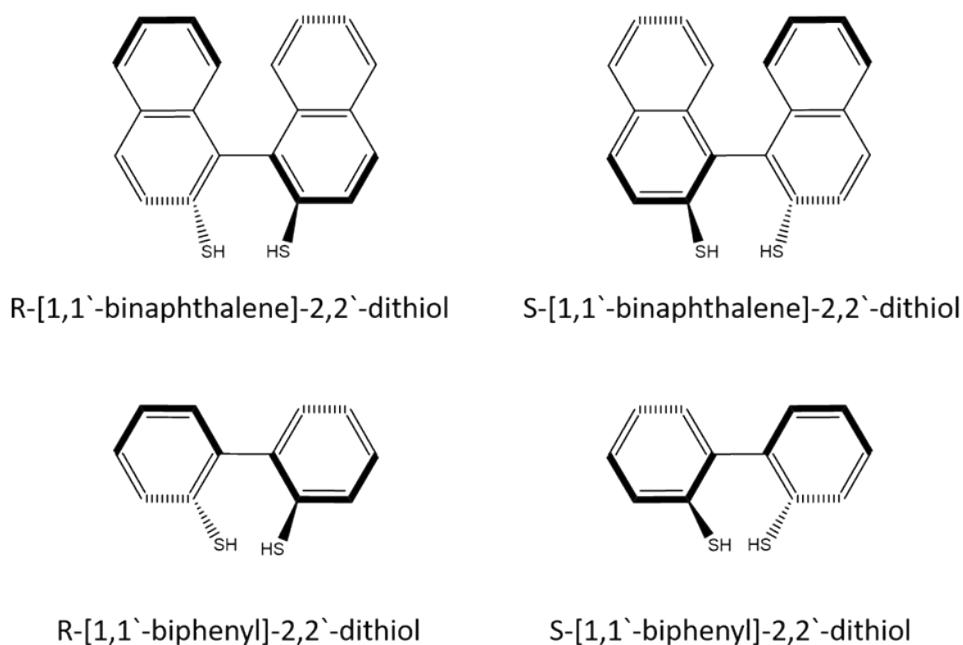

**Figure S6.** Two enantiomers of BiDi and BINAS.

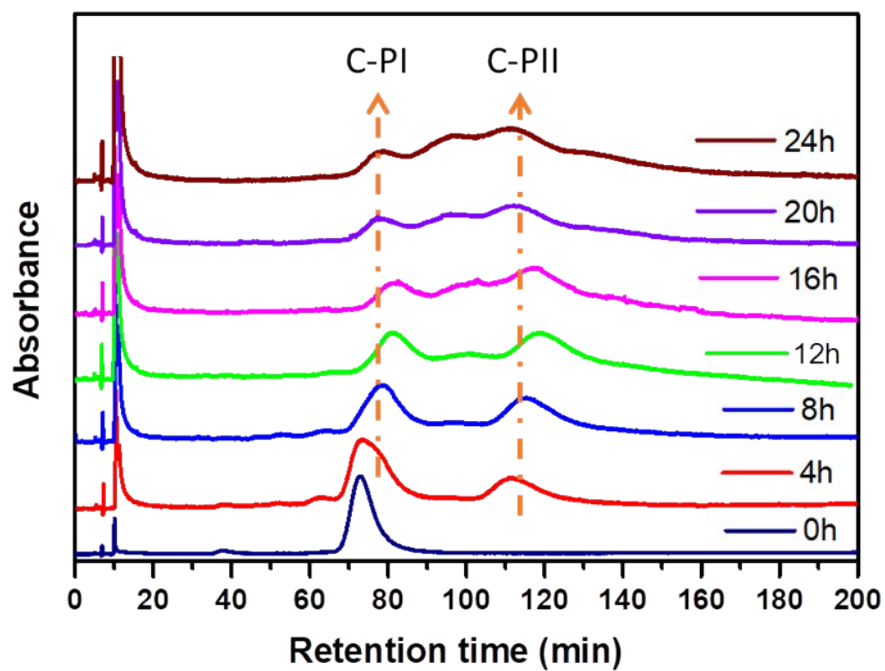

**Figure S7.** HPL Chromatograms of ligand exchange reaction between C-Au<sub>38</sub>(2-PET)<sub>24</sub> and Bi-Di. The sample was put at room temperature and the chromatograms were recorded every 4 hours. Two main peaks are marked as C-PI (80min) and C-PII (112min).

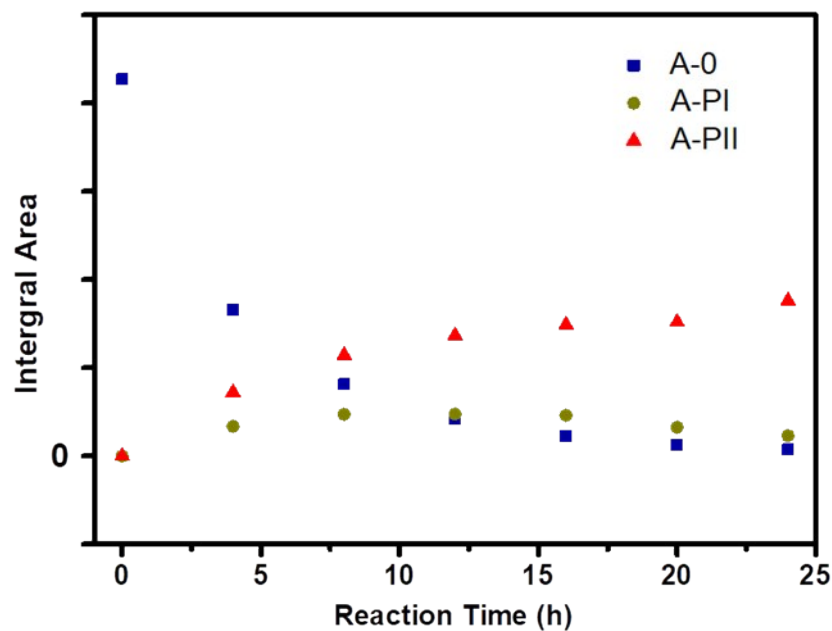

**Figure S8.** Integrated peak areas (arbitrary units) for peaks A-PI and A-PII at different reaction time. A-0 is the peak of A-Au<sub>38</sub>(2-PET)<sub>24</sub>. Data extracted from Figure 3.

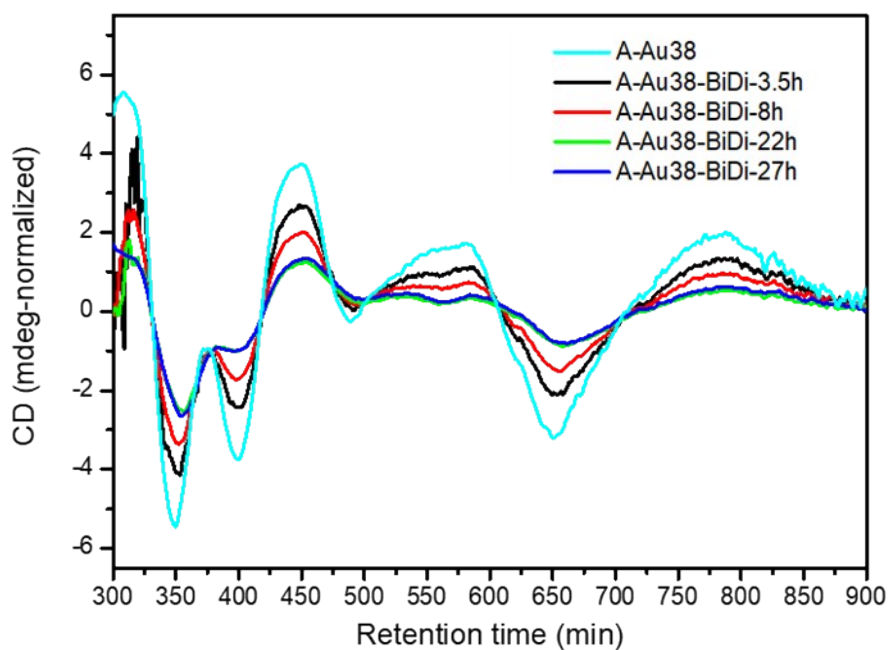

**Figure S9.** CD spectra of ligand exchange reaction between A-Au<sub>38</sub>(2-PET)<sub>24</sub> and BiDi. The sample was at room temperature and the spectrum was recorded over time. Spectra have been normalized to -1 at 375nm.

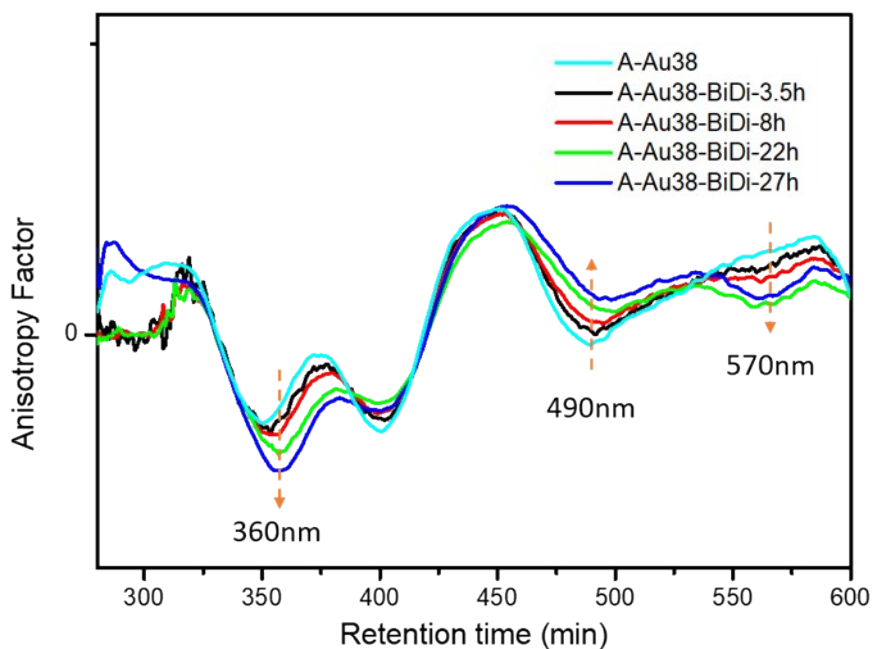

**Figure S10.** Anisotropy factors of A-Au<sub>38</sub>(2-PET)<sub>24</sub> during ligand exchange with BiDi. The sample was at room temperature.

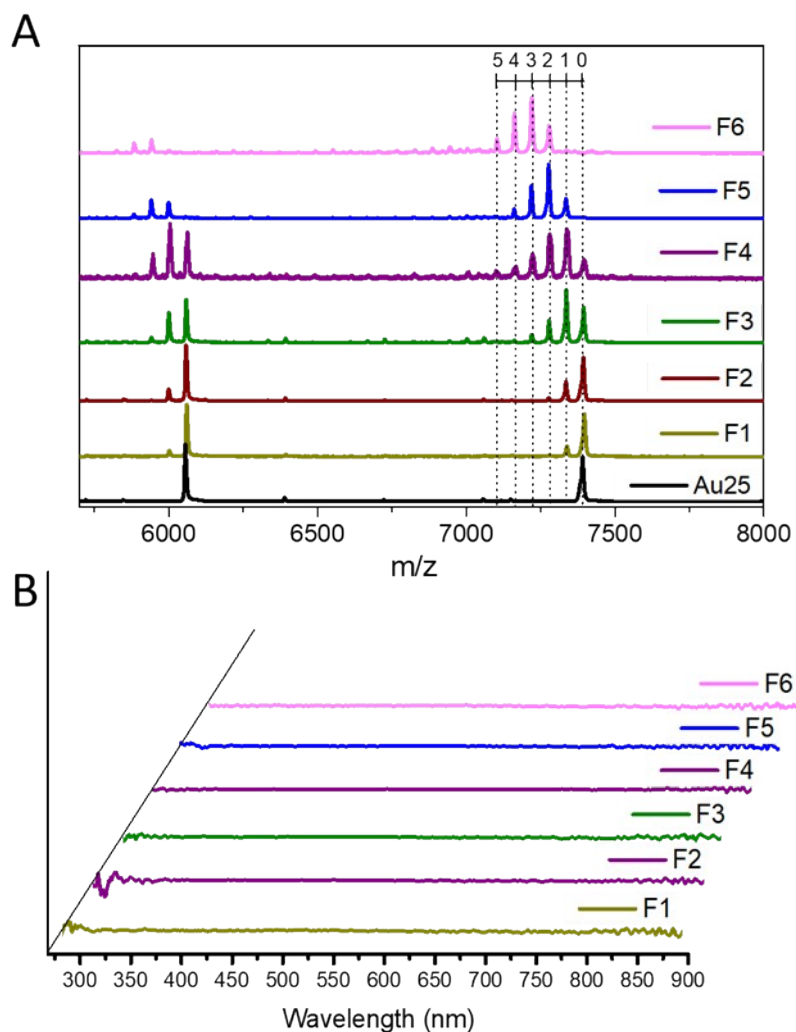

**Figure S11.** FMALDI-TOF (A) and CD spectra (B) of a sample prepared by ligand exchange of  $\text{Au}_{25}(\text{2-PET})_{18}$  cluster with BiDi. After ligand exchange the sample was passed over a size exclusion column and six fractions were collected. The labels in panel A corresponds to the number of BiDi ligands of the cluster.



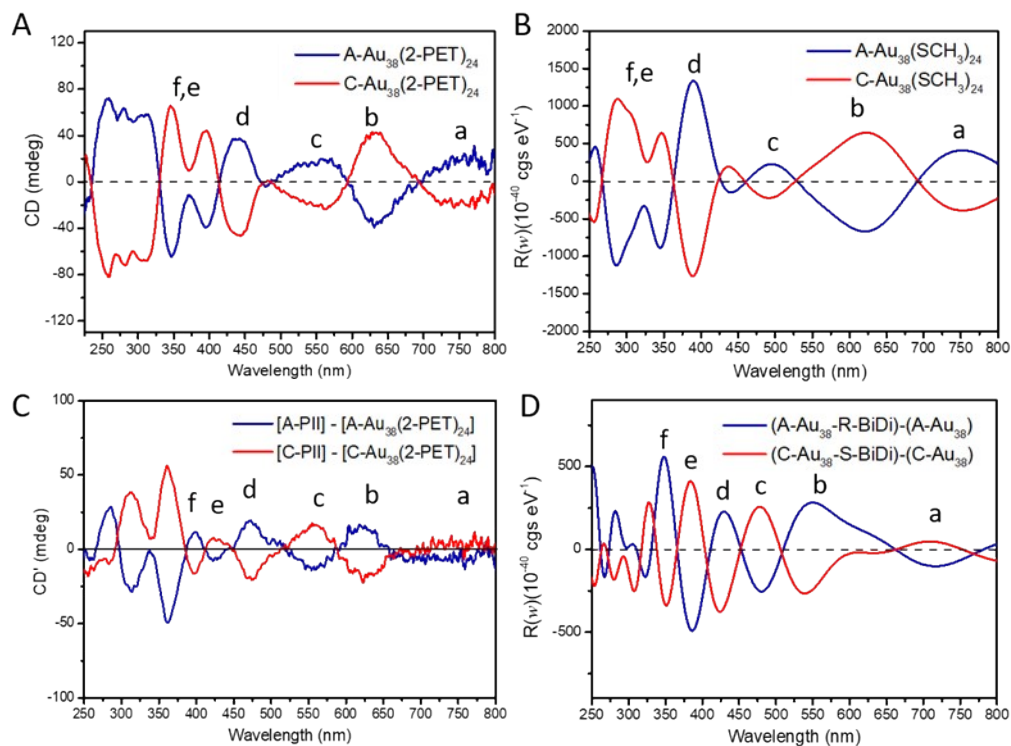

**Figure S12.** Experimental and calculated CD spectra of  $\text{Au}_{38}(\text{SR})_{24}$  clusters. (A) Experimental CD spectra of enantiopure A/C- $\text{Au}_{38}(\text{2-PET})_{24}$ ; (B) Calculated CD spectra of enantiopure A/C- $\text{Au}_{38}(\text{SCH}_3)_{24}$ ; (C) and (D) Experimental and calculated signal after subtracting the CD spectra of enantiopure  $\text{Au}_{38}(\text{SR})_{24}$  from the corresponding cluster with one BiDi in its ligand shell. Calculations were performed with real-time Density Functional Theory Method in GPAW code. For the experimental spectra the clusters were dissolved in dichloromethane and the spectra were recorded at the same concentration for the two enantiomers.

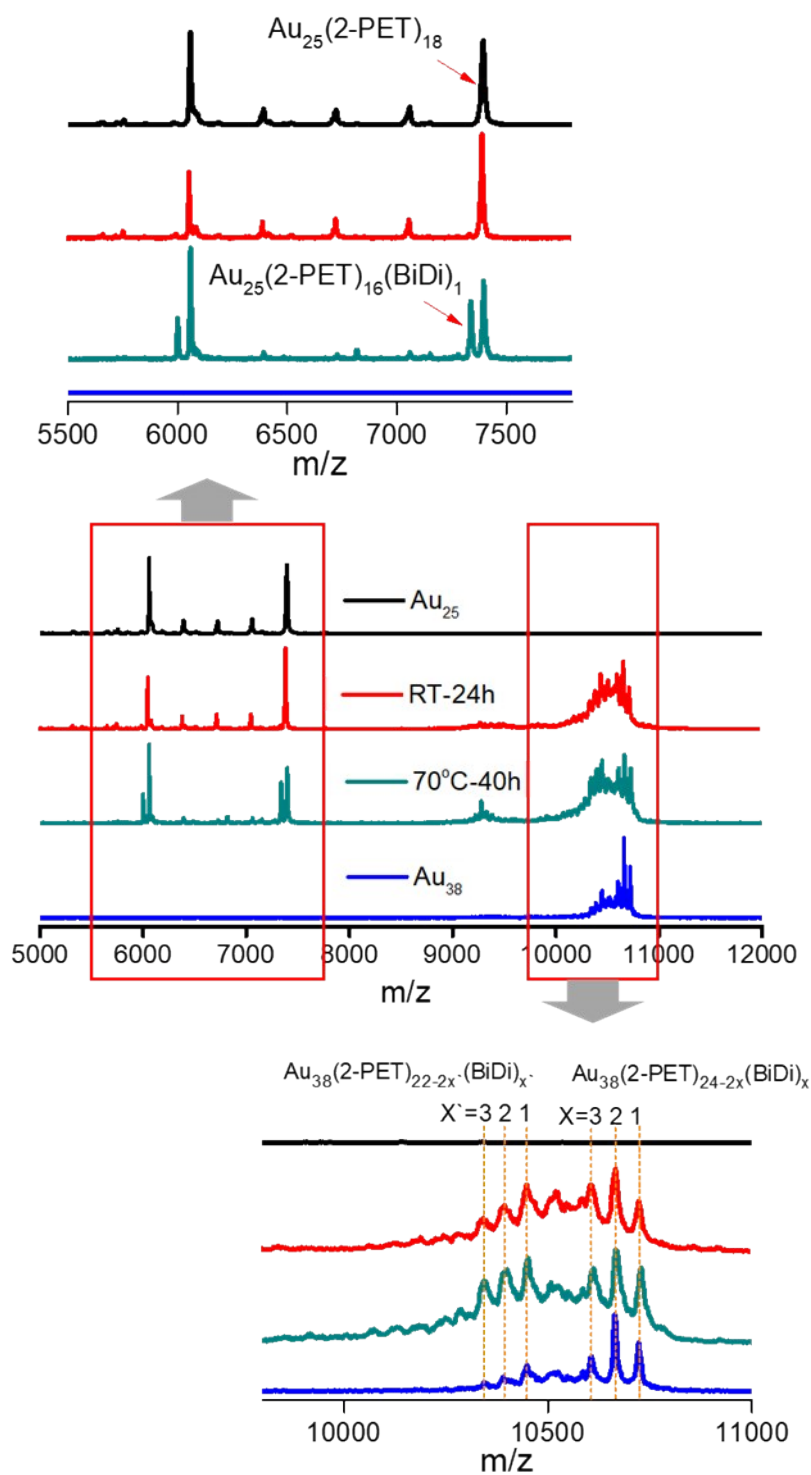

**Figure S13.** MALDI mass spectra of  $\text{Au}_{25}(\text{2-PET})_{18}$  (black) and  $\text{Au}_{38}(\text{2-PET})_{24-2x}(\text{BiDi})_x$  (blue). After mixing the two samples at room temperature (red) and at 70°C (green) for 24h separately (in the absence of free ligand) the MALDI spectra were measured. Top and bottom frames are zoom areas of the spectra (the number of exchanged BiDi ligands ( $x$  and  $x'$ ) are given at the bottom for  $\text{Au}_{38}$ ).

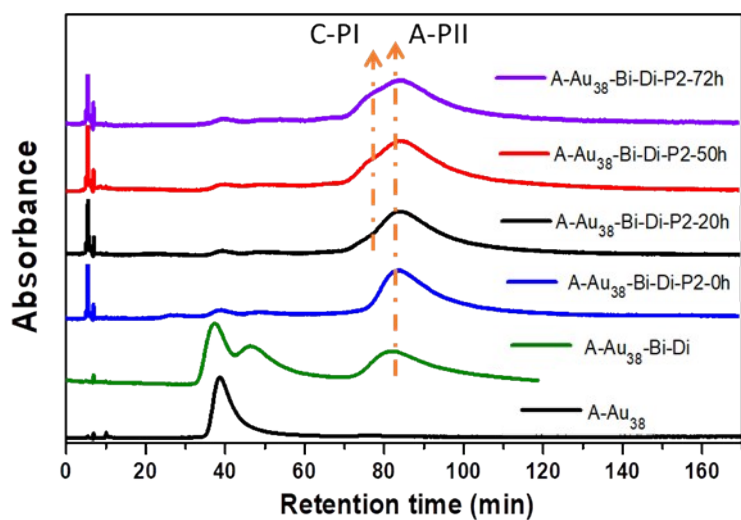

**Figure S14.** HPL Chromatograms of A-Au<sub>38</sub>(2-PET)<sub>22</sub>(R-BiDi)<sub>1</sub> sample at 70°C as a function of time. A-P-II corresponds to A-Au<sub>38</sub>-(2-PET)<sub>22</sub>(R-BiDi)<sub>1</sub>, and C-PI corresponds to C-Au<sub>38</sub>-(2-PET)<sub>22</sub>-(R-BiDi)<sub>1</sub>.

## XYZ coordinates of the clusters mentioned in this study

Structure of A-Au<sub>38</sub>-R-BiDi

170

|    |           |           |           |
|----|-----------|-----------|-----------|
| Au | 13.336658 | 13.096391 | 12.438500 |
| Au | 14.304091 | 15.708951 | 13.176746 |
| Au | 14.384316 | 15.598974 | 16.015118 |
| Au | 16.203770 | 17.483927 | 14.322754 |
| Au | 18.872854 | 13.603538 | 13.098044 |
| Au | 12.014196 | 14.498425 | 14.507483 |
| Au | 16.592180 | 14.603559 | 14.581001 |
| Au | 14.373238 | 12.860871 | 15.107463 |
| Au | 12.010795 | 11.399128 | 14.399240 |
| Au | 11.914796 | 15.501066 | 11.625075 |
| Au | 16.993603 | 15.792366 | 12.013716 |
| Au | 16.210705 | 13.002405 | 12.209796 |
| Au | 17.075285 | 11.804329 | 14.708597 |
| Au | 18.812782 | 13.721231 | 16.093855 |
| Au | 14.602532 | 14.699323 | 10.485415 |
| Au | 14.610904 | 11.695498 | 10.270217 |
| Au | 17.101557 | 16.285021 | 16.789730 |
| Au | 10.503679 | 12.921025 | 12.586986 |
| Au | 18.902473 | 16.194405 | 14.278910 |
| Au | 14.706076 | 10.722558 | 13.204808 |
| Au | 9.273796  | 14.972038 | 10.125485 |
| Au | 16.205364 | 13.417717 | 17.198893 |
| Au | 15.107701 | 18.606041 | 17.119291 |
| Au | 12.306677 | 10.603903 | 11.513763 |
| Au | 12.218235 | 16.105158 | 8.507763  |
| Au | 9.293850  | 12.620541 | 15.498675 |

|    |           |           |           |
|----|-----------|-----------|-----------|
| Au | 18.503668 | 19.085472 | 16.000479 |
| Au | 12.075327 | 13.218148 | 9.922781  |
| Au | 12.587687 | 10.323657 | 8.287164  |
| Au | 13.404417 | 11.399717 | 17.600740 |
| Au | 18.398279 | 14.576180 | 19.206104 |
| Au | 18.395849 | 11.205535 | 17.801586 |
| Au | 20.383921 | 15.899199 | 11.328193 |
| Au | 14.518664 | 8.497993  | 10.611238 |
| Au | 9.495878  | 9.815851  | 13.311835 |
| Au | 21.669193 | 14.398895 | 14.312833 |
| Au | 18.091208 | 11.715908 | 10.212542 |
| S  | 14.558817 | 16.083719 | 8.501697  |
| S  | 9.904935  | 16.402029 | 8.392594  |
| S  | 15.391244 | 8.449601  | 12.785271 |
| S  | 17.880230 | 9.875427  | 15.946284 |
| S  | 13.225245 | 17.247889 | 17.366640 |
| S  | 14.937634 | 12.447393 | 19.021551 |
| S  | 20.239481 | 18.124144 | 14.768485 |
| S  | 10.198707 | 14.698485 | 16.098293 |
| S  | 22.399706 | 15.105541 | 12.205159 |
| S  | 8.198184  | 10.596150 | 15.094125 |
| S  | 8.352643  | 13.530778 | 11.723766 |
| S  | 11.821548 | 10.118546 | 16.452099 |
| S  | 10.642246 | 8.872113  | 11.513959 |
| S  | 19.104918 | 12.395923 | 19.694315 |
| S  | 17.821184 | 16.833961 | 19.040276 |
| S  | 16.816763 | 20.223543 | 17.137884 |
| S  | 13.822567 | 8.343585  | 8.385752  |
| S  | 19.992434 | 12.155772 | 11.509020 |
| S  | 11.216622 | 12.189042 | 7.941851  |
| S  | 16.386251 | 11.153782 | 8.710220  |

|   |           |           |           |
|---|-----------|-----------|-----------|
| S | 18.432295 | 16.645041 | 10.273578 |
| C | 14.091963 | 13.857374 | 19.828964 |
| H | 13.688235 | 14.558851 | 19.093084 |
| H | 14.842948 | 14.365705 | 20.446192 |
| C | 9.543936  | 11.573794 | 8.376578  |
| H | 9.182350  | 10.958577 | 7.543874  |
| H | 8.893850  | 12.448311 | 8.508172  |
| C | 9.391132  | 15.517475 | 6.868672  |
| H | 9.833389  | 14.516442 | 6.828290  |
| H | 9.731435  | 16.107327 | 6.009548  |
| C | 23.435495 | 16.573919 | 12.583476 |
| H | 22.922232 | 17.268894 | 13.255335 |
| H | 23.683485 | 17.070164 | 11.638679 |
| S | 21.194517 | 13.700914 | 16.490747 |
| C | 20.286556 | 19.101309 | 13.215854 |
| H | 19.286127 | 19.243587 | 12.798867 |
| H | 20.900188 | 18.551500 | 12.490448 |
| C | 18.021877 | 11.823689 | 21.054813 |
| H | 16.965492 | 11.891535 | 20.770287 |
| H | 18.226999 | 12.452970 | 21.928185 |
| C | 12.648124 | 8.515533  | 16.122620 |
| H | 13.526866 | 8.642596  | 15.483902 |
| H | 11.912618 | 7.875456  | 15.621254 |
| C | 7.634979  | 14.673579 | 12.967277 |
| H | 6.746635  | 15.138823 | 12.525346 |
| H | 8.353140  | 15.440941 | 13.269249 |
| C | 11.456758 | 7.397659  | 12.241512 |
| H | 12.036876 | 7.661358  | 13.129854 |
| H | 12.134095 | 6.979370  | 11.486215 |
| C | 14.993164 | 17.795904 | 8.998550  |
| H | 14.475554 | 18.084970 | 9.920807  |

|   |           |           |           |
|---|-----------|-----------|-----------|
| H | 14.711178 | 18.467714 | 8.179563  |
| C | 17.202353 | 8.462733  | 12.500409 |
| C | 10.892427 | 14.401640 | 17.767241 |
| H | 11.468737 | 15.289565 | 18.052059 |
| H | 11.547236 | 13.521979 | 17.767525 |
| C | 6.594103  | 11.060350 | 14.330221 |
| H | 6.739809  | 11.677900 | 13.438154 |
| H | 6.009316  | 11.607202 | 15.079108 |
| C | 21.749681 | 11.951682 | 16.546741 |
| H | 22.841236 | 11.942296 | 16.453260 |
| H | 21.297039 | 11.360367 | 15.744759 |
| C | 16.404406 | 8.931179  | 16.480871 |
| H | 16.042643 | 8.363555  | 15.615412 |
| H | 15.615601 | 9.601549  | 16.841169 |
| C | 18.289980 | 15.517378 | 8.834455  |
| H | 18.332462 | 14.468660 | 9.148579  |
| H | 19.111870 | 15.738165 | 8.144138  |
| C | 12.521573 | 7.048637  | 8.363729  |
| H | 12.141844 | 6.975192  | 7.338173  |
| H | 11.699865 | 7.295873  | 9.043726  |
| C | 11.958528 | 18.062096 | 16.320351 |
| H | 12.343128 | 18.255398 | 15.312456 |
| H | 11.675607 | 19.005384 | 16.802025 |
| C | 16.356407 | 12.484273 | 7.447599  |
| H | 17.299822 | 12.452343 | 6.890761  |
| H | 16.217091 | 13.470644 | 7.898230  |
| C | 20.355530 | 10.622435 | 12.445619 |
| H | 13.289370 | 13.465909 | 20.463545 |
| H | 9.555253  | 10.984855 | 9.298504  |
| H | 8.297234  | 15.454501 | 6.863740  |
| H | 24.351902 | 16.211641 | 13.062966 |

|    |           |           |           |
|----|-----------|-----------|-----------|
| H  | 20.743219 | 20.071968 | 13.441989 |
| H  | 18.283958 | 10.782422 | 21.275490 |
| H  | 12.934731 | 8.062206  | 17.077723 |
| H  | 7.353286  | 14.084112 | 13.849179 |
| H  | 10.678242 | 6.668861  | 12.494371 |
| H  | 16.077398 | 17.837372 | 9.158247  |
| H  | 17.491396 | 9.294105  | 11.847586 |
| H  | 17.481647 | 7.507349  | 12.042155 |
| H  | 17.694782 | 8.568850  | 13.474010 |
| H  | 10.060442 | 14.254158 | 18.464754 |
| H  | 6.073366  | 10.135268 | 14.057131 |
| H  | 21.453339 | 11.540180 | 17.518269 |
| H  | 16.706768 | 8.243112  | 17.277973 |
| H  | 17.328560 | 15.715728 | 8.346337  |
| H  | 12.979245 | 6.097075  | 8.656564  |
| H  | 11.092324 | 17.392227 | 16.263680 |
| H  | 15.518462 | 12.268710 | 6.773557  |
| H  | 21.249205 | 10.825699 | 13.048339 |
| H  | 20.565275 | 9.818369  | 11.731787 |
| H  | 19.525372 | 10.343102 | 13.101034 |
| H  | 17.252954 | 20.472389 | 12.336152 |
| C  | 16.337500 | 19.988398 | 11.975554 |
| H  | 15.772168 | 20.692862 | 11.354768 |
| H  | 16.595549 | 19.098597 | 11.392821 |
| S  | 15.331425 | 19.572212 | 13.452844 |
| Au | 13.391796 | 18.583298 | 12.601669 |
| S  | 11.358500 | 17.874706 | 11.679604 |
| H  | 10.073647 | 19.141640 | 13.291607 |
| C  | 10.098526 | 18.087830 | 12.993470 |
| H  | 10.305957 | 17.455019 | 13.861891 |
| H  | 9.134233  | 17.809618 | 12.551806 |



|   |           |           |           |
|---|-----------|-----------|-----------|
| C | 18.127060 | 19.851789 | 19.673489 |
| C | 19.322279 | 19.138401 | 19.128353 |
| C | 17.057163 | 20.368418 | 18.916113 |
| C | 19.345795 | 17.751898 | 18.851622 |
| C | 18.118607 | 20.084930 | 21.062593 |
| C | 20.524725 | 19.858875 | 19.024187 |
| C | 16.045813 | 21.111609 | 19.549030 |
| C | 20.547991 | 17.134987 | 18.474937 |
| C | 17.101807 | 20.799839 | 21.689249 |
| C | 21.714851 | 19.243048 | 18.645821 |
| C | 16.060640 | 21.325918 | 20.921055 |
| C | 21.722694 | 17.873566 | 18.373013 |
| H | 18.940699 | 19.680025 | 21.655893 |
| H | 20.506287 | 20.924873 | 19.253735 |
| H | 15.236857 | 21.515160 | 18.941339 |
| H | 20.552271 | 16.064833 | 18.267088 |
| H | 17.124868 | 20.948589 | 22.768576 |
| H | 22.630518 | 19.829594 | 18.567671 |
| H | 15.261496 | 21.902874 | 21.386082 |
| H | 22.645203 | 17.368975 | 18.082762 |

## Structure of A-Au<sub>38</sub>-S-BiDi

170

|    |           |           |           |
|----|-----------|-----------|-----------|
| Au | 12.754828 | 12.776919 | 16.831259 |
| Au | 11.077629 | 14.015638 | 14.890660 |
| Au | 12.686800 | 16.197653 | 13.880052 |
| Au | 10.394115 | 14.881140 | 12.281201 |
| Au | 13.264165 | 10.932828 | 11.588334 |
| Au | 12.597780 | 15.602730 | 16.807619 |
| Au | 12.906498 | 13.585973 | 12.725175 |
| Au | 14.476693 | 14.238646 | 15.054079 |
| Au | 15.107731 | 14.114363 | 17.823471 |
| Au | 10.212361 | 13.987872 | 17.601284 |
| Au | 10.614445 | 11.911380 | 12.918249 |
| Au | 13.004289 | 11.211077 | 14.403245 |
| Au | 15.393473 | 12.295304 | 13.129130 |
| Au | 14.669373 | 13.393425 | 10.497440 |
| Au | 10.479338 | 11.393877 | 15.892897 |
| Au | 12.811769 | 9.913694  | 16.907021 |
| Au | 12.701729 | 15.786341 | 10.925062 |
| Au | 8.296764  | 15.296796 | 15.009220 |
| Au | 12.692449 | 14.084073 | 19.375305 |
| Au | 11.609358 | 12.885602 | 10.320806 |
| Au | 15.284431 | 11.685693 | 16.179806 |
| Au | 9.507385  | 13.611021 | 20.677715 |
| Au | 15.205968 | 15.303299 | 12.516505 |
| Au | 10.742039 | 18.113214 | 11.818629 |
| Au | 14.190282 | 11.484714 | 18.899651 |
| Au | 7.993611  | 11.598022 | 18.202974 |
| Au | 14.290817 | 16.736069 | 19.562456 |

|    |           |           |           |
|----|-----------|-----------|-----------|
| Au | 9.994111  | 15.689471 | 9.295308  |
| Au | 11.094060 | 11.536036 | 18.783924 |
| Au | 12.685350 | 8.797109  | 19.716776 |
| Au | 16.892153 | 16.002064 | 15.497664 |
| Au | 15.796879 | 16.311407 | 9.673480  |
| Au | 17.705463 | 13.684467 | 11.186707 |
| Au | 10.520213 | 9.820723  | 10.276544 |
| Au | 15.894524 | 8.986975  | 18.119102 |
| Au | 15.392339 | 13.615190 | 21.005018 |
| Au | 13.378751 | 10.993890 | 8.417338  |
| Au | 13.389312 | 8.294225  | 13.888911 |
| S  | 8.260393  | 10.479111 | 16.169474 |
| S  | 7.415638  | 12.686161 | 20.193062 |
| S  | 17.116318 | 10.148225 | 16.502237 |
| S  | 8.174631  | 15.270189 | 17.347637 |
| S  | 17.748734 | 11.926819 | 12.729875 |
| S  | 11.897228 | 18.488964 | 13.818443 |
| S  | 16.877724 | 16.862238 | 13.323571 |
| S  | 8.075905  | 15.446684 | 12.688536 |
| S  | 10.158916 | 13.487411 | 8.513557  |
| S  | 13.024987 | 17.744226 | 17.867550 |
| S  | 11.819433 | 9.246484  | 8.417101  |
| S  | 15.650167 | 15.922873 | 21.281176 |
| S  | 11.473103 | 14.675836 | 21.362913 |
| S  | 17.212551 | 15.311885 | 17.709364 |
| S  | 15.212054 | 11.286254 | 21.101282 |
| S  | 17.899538 | 15.301892 | 9.504267  |
| S  | 13.747327 | 17.427626 | 9.523774  |
| S  | 9.679755  | 17.967005 | 9.744525  |
| S  | 14.681950 | 7.555338  | 19.519936 |
| S  | 13.862041 | 8.582218  | 11.613509 |

|   |           |           |           |
|---|-----------|-----------|-----------|
| S | 10.697020 | 9.816781  | 20.413475 |
| S | 12.913450 | 7.642952  | 16.087530 |
| S | 9.106229  | 10.205229 | 12.096213 |
| C | 16.041498 | 18.493195 | 13.382543 |
| C | 11.168599 | 10.526348 | 22.043684 |
| C | 7.197331  | 11.330643 | 21.411346 |
| C | 13.221236 | 17.137329 | 7.790735  |
| C | 10.725897 | 9.557136  | 6.974749  |
| S | 14.961598 | 12.691320 | 8.219096  |
| C | 11.170430 | 13.644978 | 6.992104  |
| C | 18.575584 | 14.086885 | 17.637400 |
| C | 7.124234  | 11.389945 | 15.057182 |
| C | 17.109577 | 8.999384  | 15.071601 |
| C | 14.255815 | 18.643965 | 16.847584 |
| C | 16.576296 | 11.828792 | 8.092184  |
| C | 18.647837 | 12.651023 | 14.153436 |
| C | 7.888091  | 18.134312 | 10.084509 |
| C | 9.353890  | 8.701843  | 13.113306 |
| C | 8.536548  | 16.979763 | 17.898634 |
| C | 10.576244 | 18.609112 | 15.083898 |
| C | 11.174358 | 7.060212  | 16.084333 |
| C | 15.689287 | 8.523980  | 11.467976 |
| C | 7.087250  | 13.988693 | 12.181234 |
| C | 14.751078 | 16.280537 | 22.840614 |
| C | 11.064808 | 16.453506 | 21.163286 |
| C | 19.094238 | 16.531214 | 10.150260 |
| H | 15.923232 | 18.832651 | 12.346384 |
| H | 16.680199 | 19.194370 | 13.932252 |
| H | 15.057959 | 18.428190 | 13.856200 |
| H | 10.444378 | 11.313493 | 22.293694 |
| H | 12.175220 | 10.952879 | 22.022154 |

|   |           |           |           |
|---|-----------|-----------|-----------|
| H | 11.122973 | 9.721844  | 22.787495 |
| H | 6.277393  | 10.795030 | 21.149702 |
| H | 7.098792  | 11.776591 | 22.407743 |
| H | 8.045410  | 10.638563 | 21.386141 |
| H | 12.142904 | 17.322647 | 7.729508  |
| H | 13.445461 | 16.115265 | 7.475080  |
| H | 13.758215 | 17.849417 | 7.151695  |
| H | 9.973369  | 8.760013  | 6.949090  |
| H | 11.338070 | 9.519345  | 6.066802  |
| H | 10.227668 | 10.527967 | 7.055457  |
| H | 10.543432 | 14.098654 | 6.215925  |
| H | 11.482125 | 12.639241 | 6.685018  |
| H | 12.060536 | 14.255688 | 7.160817  |
| H | 18.867229 | 13.874416 | 18.672291 |
| H | 19.425364 | 14.532463 | 17.108301 |
| H | 18.262651 | 13.161366 | 17.144432 |
| H | 6.095500  | 11.142817 | 15.341873 |
| H | 7.318533  | 11.057150 | 14.031069 |
| H | 7.286668  | 12.470522 | 15.128215 |
| H | 17.535786 | 9.530893  | 14.211986 |
| H | 16.089495 | 8.677393  | 14.833667 |
| H | 17.730488 | 8.131412  | 15.320485 |
| H | 13.735920 | 19.041677 | 15.966264 |
| H | 15.063124 | 17.976267 | 16.522306 |
| H | 14.665322 | 19.464182 | 17.447565 |
| H | 16.590607 | 11.278584 | 7.144472  |
| H | 16.729675 | 11.143184 | 8.930275  |
| H | 17.360682 | 12.594193 | 8.092951  |
| H | 18.553198 | 11.953027 | 14.995232 |
| H | 18.228853 | 13.623334 | 14.439231 |
| H | 19.700480 | 12.758500 | 13.871489 |

|   |           |           |           |
|---|-----------|-----------|-----------|
| H | 7.349874  | 17.934551 | 9.151037  |
| H | 7.706850  | 19.166222 | 10.405123 |
| H | 7.565849  | 17.438786 | 10.867208 |
| H | 8.851346  | 8.856176  | 14.075728 |
| H | 10.419872 | 8.512791  | 13.282559 |
| H | 8.900885  | 7.857637  | 12.581462 |
| H | 7.759671  | 17.647118 | 17.508638 |
| H | 9.523625  | 17.310234 | 17.560600 |
| H | 8.500354  | 16.974686 | 18.994593 |
| H | 9.999092  | 19.520758 | 14.892134 |
| H | 11.061635 | 18.670538 | 16.065372 |
| H | 9.920485  | 17.731102 | 15.052274 |
| H | 10.928839 | 6.795941  | 17.119747 |
| H | 11.102926 | 6.170841  | 15.447011 |
| H | 10.489554 | 7.838916  | 15.733988 |
| H | 15.931859 | 8.710654  | 10.415645 |
| H | 16.036161 | 7.524362  | 11.752421 |
| H | 16.167320 | 9.283364  | 12.093610 |
| H | 6.093488  | 14.066442 | 12.635457 |
| H | 7.569722  | 13.056299 | 12.485131 |
| H | 7.002755  | 14.018521 | 11.089035 |
| H | 14.687621 | 17.368649 | 22.945950 |
| H | 15.335683 | 15.862247 | 23.667873 |
| H | 13.748131 | 15.840804 | 22.839680 |
| H | 10.314440 | 16.719061 | 21.916769 |
| H | 10.686178 | 16.663006 | 20.159239 |
| H | 11.982296 | 17.033943 | 21.325409 |
| H | 19.105635 | 17.379486 | 9.456591  |
| H | 20.082815 | 16.060287 | 10.175756 |
| H | 18.806919 | 16.867662 | 11.151860 |
| C | 16.119480 | 8.403375  | 21.859274 |

|   |           |           |           |
|---|-----------|-----------|-----------|
| C | 17.087425 | 9.258460  | 21.110085 |
| C | 15.105890 | 7.620886  | 21.271254 |
| C | 16.833487 | 10.604032 | 20.765322 |
| C | 16.296154 | 8.319868  | 23.253401 |
| C | 18.360762 | 8.727905  | 20.844244 |
| C | 14.325440 | 6.771324  | 22.078808 |
| C | 17.847599 | 11.373001 | 20.174976 |
| C | 15.505900 | 7.495768  | 24.049110 |
| C | 19.360296 | 9.495197  | 20.250679 |
| C | 14.517948 | 6.708166  | 23.453608 |
| C | 19.100958 | 10.826761 | 19.920258 |
| H | 17.078310 | 8.928580  | 23.708797 |
| H | 18.553558 | 7.689084  | 21.114840 |
| H | 13.554568 | 6.160687  | 21.606440 |
| H | 17.628851 | 12.408641 | 19.916784 |
| H | 15.669198 | 7.460493  | 25.127043 |
| H | 20.336388 | 9.054699  | 20.049816 |
| H | 13.899731 | 6.044352  | 24.057997 |
| H | 19.873594 | 11.443005 | 19.460150 |

## Structure of C-Au<sub>38</sub>-R-BiDi

170

|    |           |           |           |
|----|-----------|-----------|-----------|
| Au | 13.624841 | 12.790284 | 16.813309 |
| Au | 15.327804 | 14.019903 | 14.891575 |
| Au | 13.705708 | 16.190603 | 13.882850 |
| Au | 16.003706 | 14.880984 | 12.281412 |
| Au | 13.137221 | 10.931563 | 11.592511 |
| Au | 13.799547 | 15.606243 | 16.808073 |
| Au | 13.493976 | 13.582560 | 12.728683 |
| Au | 11.906162 | 14.256024 | 15.039951 |
| Au | 11.286672 | 14.115024 | 17.817417 |
| Au | 16.184578 | 13.992438 | 17.598942 |
| Au | 15.785237 | 11.911990 | 12.917592 |
| Au | 13.393899 | 11.208926 | 14.403289 |
| Au | 11.004150 | 12.293613 | 13.130656 |
| Au | 11.728429 | 13.395503 | 10.508164 |
| Au | 15.911984 | 11.395486 | 15.892312 |
| Au | 13.584302 | 9.912731  | 16.907454 |
| Au | 13.695785 | 15.784081 | 10.927306 |
| Au | 18.099508 | 15.301672 | 15.008290 |
| Au | 13.695707 | 14.086837 | 19.373985 |
| Au | 14.791792 | 12.886777 | 10.321363 |
| Au | 11.114058 | 11.684651 | 16.178143 |
| Au | 16.876673 | 13.668754 | 20.617443 |
| Au | 11.190121 | 15.307571 | 12.509572 |
| Au | 15.603430 | 18.100868 | 11.869200 |
| Au | 12.206918 | 11.486654 | 18.902481 |
| Au | 18.401020 | 11.595079 | 18.190928 |
| Au | 12.082841 | 16.772371 | 19.523237 |



|    |           |           |           |
|----|-----------|-----------|-----------|
| Au | 16.398077 | 15.690583 | 9.300428  |
| Au | 15.296019 | 11.555726 | 18.763800 |
| Au | 13.709998 | 8.801931  | 19.718203 |
| Au | 9.509311  | 16.005093 | 15.494197 |
| Au | 10.600884 | 16.308733 | 9.672316  |
| Au | 8.689757  | 13.684763 | 11.185634 |
| Au | 15.904209 | 9.812819  | 10.283846 |
| Au | 10.504979 | 8.989304  | 18.114405 |
| Au | 11.000854 | 13.615045 | 20.998072 |
| Au | 13.080784 | 10.995753 | 8.480082  |
| Au | 13.015837 | 8.286608  | 13.898279 |
| S  | 18.136473 | 10.492235 | 16.149042 |
| S  | 18.953667 | 12.693807 | 20.173725 |
| S  | 9.285236  | 10.148520 | 16.493093 |
| S  | 18.226923 | 15.273758 | 17.346336 |
| S  | 8.648979  | 11.926929 | 12.728750 |
| S  | 14.466534 | 18.477312 | 13.875232 |
| S  | 9.533043  | 16.878191 | 13.323040 |
| S  | 18.321716 | 15.444331 | 12.687683 |
| S  | 16.242191 | 13.492581 | 8.511014  |
| S  | 13.372165 | 17.768597 | 17.847851 |
| S  | 14.614897 | 9.230466  | 8.430266  |
| S  | 10.731168 | 15.929448 | 21.246059 |
| S  | 14.913842 | 14.707294 | 21.351954 |
| S  | 9.178667  | 15.309528 | 17.703791 |
| S  | 11.163218 | 11.281954 | 21.102499 |
| S  | 8.498163  | 15.303036 | 9.506733  |
| S  | 12.650700 | 17.424610 | 9.516723  |
| S  | 16.676094 | 17.962852 | 9.788796  |
| S  | 11.717113 | 7.556532  | 19.516520 |
| S  | 12.541373 | 8.579119  | 11.622416 |

|   |           |           |           |
|---|-----------|-----------|-----------|
| S | 15.684782 | 9.849697  | 20.412500 |
| S | 13.499154 | 7.634764  | 16.098129 |
| S | 17.297659 | 10.200472 | 12.108546 |
| C | 10.380527 | 18.501921 | 13.373932 |
| C | 15.196053 | 10.570207 | 22.028185 |
| C | 19.146997 | 11.347236 | 21.405312 |
| C | 13.192555 | 17.110243 | 7.792499  |
| C | 15.693739 | 9.561275  | 6.981214  |
| S | 11.474244 | 12.680389 | 8.238100  |
| C | 15.231194 | 13.646060 | 6.987117  |
| C | 7.824644  | 14.073857 | 17.626474 |
| C | 19.255686 | 11.430048 | 15.037942 |
| C | 9.292384  | 8.997779  | 15.065394 |
| C | 12.134544 | 18.649527 | 16.819881 |
| C | 9.865141  | 11.813352 | 8.090552  |
| C | 7.747118  | 12.647985 | 14.152164 |
| C | 18.473640 | 18.136034 | 10.107224 |
| C | 17.021990 | 8.700711  | 13.128481 |
| C | 17.867315 | 16.980198 | 17.909914 |
| C | 15.814703 | 18.578259 | 15.112668 |
| C | 15.243358 | 7.067268  | 16.103086 |
| C | 10.714294 | 8.535076  | 11.481921 |
| C | 19.298475 | 13.974166 | 12.190258 |
| C | 11.636751 | 16.292566 | 22.802319 |
| C | 15.295266 | 16.487646 | 21.140490 |
| C | 7.302356  | 16.535467 | 10.150219 |
| H | 10.476832 | 18.845301 | 12.336746 |
| H | 9.761314  | 19.205147 | 13.942576 |
| H | 11.375484 | 18.421804 | 13.821809 |
| H | 15.933591 | 11.339623 | 22.291515 |
| H | 14.200190 | 11.020345 | 21.980814 |

|   |           |           |           |
|---|-----------|-----------|-----------|
| H | 15.208388 | 9.765107  | 22.772661 |
| H | 20.073898 | 10.815830 | 21.159470 |
| H | 19.231588 | 11.798512 | 22.400623 |
| H | 18.303473 | 10.650323 | 21.368059 |
| H | 14.265233 | 17.330492 | 7.737544  |
| H | 13.008603 | 16.072973 | 7.500282  |
| H | 12.637065 | 17.785257 | 7.131731  |
| H | 16.444750 | 8.763027  | 6.938248  |
| H | 15.069929 | 9.531948  | 6.080622  |
| H | 16.193844 | 10.530854 | 7.064689  |
| H | 15.856122 | 14.099677 | 6.209331  |
| H | 14.922584 | 12.638304 | 6.683564  |
| H | 14.338228 | 14.254728 | 7.153386  |
| H | 7.520508  | 13.870708 | 18.659824 |
| H | 6.978216  | 14.505339 | 17.080137 |
| H | 8.149952  | 13.145301 | 17.147137 |
| H | 20.289055 | 11.240890 | 15.347922 |
| H | 19.097742 | 11.062628 | 14.017583 |
| H | 19.042778 | 12.504085 | 15.079483 |
| H | 8.868185  | 9.529813  | 14.205323 |
| H | 10.310584 | 8.670162  | 14.827273 |
| H | 8.667941  | 8.133169  | 15.317187 |
| H | 12.653650 | 19.050751 | 15.940863 |
| H | 11.337158 | 17.969641 | 16.495756 |
| H | 11.714144 | 19.467766 | 17.415211 |
| H | 9.861092  | 11.262533 | 7.143268  |
| H | 9.696479  | 11.129171 | 8.927078  |
| H | 9.081194  | 12.578861 | 8.080706  |
| H | 7.844666  | 11.951035 | 14.993261 |
| H | 8.162304  | 13.622932 | 14.435999 |
| H | 6.693479  | 12.752573 | 13.871162 |

|   |           |           |           |
|---|-----------|-----------|-----------|
| H | 18.997921 | 17.948399 | 9.162622  |
| H | 18.658596 | 19.163572 | 10.440522 |
| H | 18.804941 | 17.428658 | 10.875917 |
| H | 17.522049 | 8.851589  | 14.092431 |
| H | 15.952429 | 8.526484  | 13.292285 |
| H | 17.466993 | 7.848052  | 12.603415 |
| H | 18.639696 | 17.650887 | 17.516338 |
| H | 16.876320 | 17.313427 | 17.586939 |
| H | 17.916681 | 16.966930 | 19.005259 |
| H | 16.389214 | 19.490696 | 14.918395 |
| H | 15.351369 | 18.631943 | 16.104559 |
| H | 16.469198 | 17.700909 | 15.056043 |
| H | 15.473205 | 6.762578  | 17.131355 |
| H | 15.337750 | 6.206564  | 15.432856 |
| H | 15.926728 | 7.865301  | 15.798191 |
| H | 10.470094 | 8.714478  | 10.428655 |
| H | 10.360760 | 7.540790  | 11.777171 |
| H | 10.245812 | 9.304787  | 12.102052 |
| H | 20.294235 | 14.054424 | 12.639440 |
| H | 18.814201 | 13.045730 | 12.505399 |
| H | 19.376484 | 13.990801 | 11.097385 |
| H | 11.694297 | 17.380898 | 22.913670 |
| H | 11.063191 | 15.865767 | 23.633659 |
| H | 12.642037 | 15.858297 | 22.785946 |
| H | 16.054548 | 16.761827 | 21.881552 |
| H | 15.659158 | 16.694662 | 20.130823 |
| H | 14.372573 | 17.056755 | 21.311476 |
| H | 7.286086  | 17.380713 | 9.452600  |
| H | 6.314656  | 16.061571 | 10.180439 |
| H | 7.588684  | 16.878971 | 11.149958 |
| C | 10.258470 | 8.396691  | 21.847084 |

|   |           |           |           |
|---|-----------|-----------|-----------|
| C | 9.292465  | 9.253059  | 21.096699 |
| C | 11.279570 | 7.619178  | 21.265095 |
| C | 9.543931  | 10.600500 | 20.754616 |
| C | 10.072550 | 8.308913  | 23.240517 |
| C | 8.019292  | 8.724875  | 20.829063 |
| C | 12.058614 | 6.773162  | 22.077814 |
| C | 8.531989  | 11.370070 | 20.163193 |
| C | 10.861679 | 7.489631  | 24.042274 |
| C | 7.020234  | 9.493092  | 20.235624 |
| C | 11.859316 | 6.710471  | 23.452026 |
| C | 7.280153  | 10.824034 | 19.905443 |
| H | 9.282558  | 8.913269  | 23.688675 |
| H | 7.825091  | 7.687419  | 21.101460 |
| H | 12.838481 | 6.168004  | 21.612396 |
| H | 8.750487  | 12.406933 | 19.908354 |
| H | 10.695200 | 7.455025  | 25.119234 |
| H | 6.041783  | 9.054363  | 20.038130 |
| H | 12.483933 | 6.054738  | 24.059099 |
| H | 6.508931  | 11.441097 | 19.444939 |

## Structure of C-Au<sub>38</sub>-S-BiDi

170

|    |           |           |           |
|----|-----------|-----------|-----------|
| Au | 17.001957 | 13.004756 | 12.417734 |
| Au | 16.009703 | 15.603657 | 13.193195 |
| Au | 15.998242 | 15.404037 | 16.027449 |
| Au | 14.101460 | 17.314337 | 14.410216 |
| Au | 11.508481 | 13.395503 | 13.101201 |
| Au | 18.306965 | 14.394538 | 14.511312 |
| Au | 13.796241 | 14.406089 | 14.586923 |
| Au | 16.015543 | 12.673023 | 15.097550 |
| Au | 18.379805 | 11.281010 | 14.315960 |
| Au | 18.407213 | 15.474965 | 11.712550 |
| Au | 13.387062 | 15.679846 | 12.069175 |
| Au | 14.119156 | 12.874108 | 12.196698 |
| Au | 13.320572 | 11.604955 | 14.691096 |
| Au | 11.595187 | 13.504217 | 16.108383 |
| Au | 15.712471 | 14.606901 | 10.488927 |
| Au | 15.716708 | 11.682683 | 10.193416 |
| Au | 13.207810 | 16.007109 | 16.812151 |
| Au | 19.873484 | 12.919252 | 12.575191 |
| Au | 11.467902 | 15.995063 | 14.277061 |
| Au | 15.675043 | 10.598134 | 13.122968 |
| Au | 21.093195 | 14.995470 | 10.123128 |
| Au | 14.199455 | 13.209336 | 17.203365 |
| Au | 15.201227 | 18.392965 | 17.198502 |
| Au | 18.025969 | 10.582402 | 11.407080 |
| Au | 18.086765 | 16.112539 | 8.592605  |
| Au | 21.103304 | 12.524328 | 15.394590 |
| Au | 11.800053 | 18.807007 | 16.004988 |

|    |           |           |           |
|----|-----------|-----------|-----------|
| Au | 18.335665 | 13.268135 | 9.959240  |
| Au | 17.798330 | 10.400605 | 8.207101  |
| Au | 17.015200 | 11.193342 | 17.573986 |
| Au | 12.000141 | 14.286093 | 19.280277 |
| Au | 12.092158 | 10.929261 | 17.803635 |
| Au | 10.075272 | 15.702971 | 11.401507 |
| Au | 15.811570 | 8.484702  | 10.499365 |
| Au | 20.884071 | 9.803979  | 13.102931 |
| Au | 8.797537  | 14.115512 | 14.317325 |
| Au | 12.282149 | 11.606233 | 10.131102 |
| S  | 15.749973 | 16.076124 | 8.572693  |
| S  | 20.395485 | 16.439470 | 8.420771  |
| S  | 14.956161 | 8.328015  | 12.672505 |
| S  | 12.593856 | 9.641111  | 15.914802 |
| S  | 17.080379 | 17.031843 | 17.457531 |
| S  | 15.487618 | 12.213359 | 19.006346 |
| S  | 10.046819 | 17.871088 | 14.778508 |
| S  | 20.175026 | 14.573654 | 16.056034 |
| S  | 8.059833  | 14.821558 | 12.213109 |
| S  | 22.194609 | 10.509889 | 14.903137 |
| S  | 22.028296 | 13.554743 | 11.714238 |
| S  | 18.647451 | 10.009477 | 16.379997 |
| S  | 19.716717 | 8.858513  | 11.315423 |
| S  | 11.349985 | 12.082065 | 19.710108 |
| S  | 12.507731 | 16.566801 | 19.080000 |
| S  | 13.465951 | 19.971294 | 17.153494 |
| S  | 16.543726 | 8.424153  | 8.275740  |
| S  | 10.381409 | 12.015841 | 11.444896 |
| S  | 19.157639 | 12.279621 | 7.929216  |
| S  | 13.984790 | 11.114128 | 8.599256  |
| S  | 11.965412 | 16.557695 | 10.324224 |

|   |           |           |           |
|---|-----------|-----------|-----------|
| C | 16.373966 | 13.615616 | 19.788153 |
| H | 16.728006 | 14.331591 | 19.041142 |
| H | 15.661851 | 14.111878 | 20.457840 |
| C | 20.830217 | 11.651011 | 8.349758  |
| H | 21.163460 | 10.998753 | 7.534201  |
| H | 21.497663 | 12.517228 | 8.438136  |
| C | 20.880320 | 15.557192 | 6.885480  |
| H | 20.461143 | 14.545639 | 6.862032  |
| H | 20.501093 | 16.134043 | 6.034534  |
| C | 6.978889  | 16.251650 | 12.604155 |
| H | 7.467494  | 16.946743 | 13.294606 |
| H | 6.730785  | 16.758429 | 11.664933 |
| S | 9.227644  | 13.443705 | 16.510122 |
| C | 9.963238  | 18.882364 | 13.249460 |
| H | 10.954203 | 19.045261 | 12.818779 |
| H | 9.342854  | 18.343649 | 12.521582 |
| C | 12.406832 | 11.513500 | 21.092382 |
| H | 13.469488 | 11.620699 | 20.847801 |
| H | 12.153638 | 12.118783 | 21.970121 |
| C | 17.908741 | 8.359720  | 16.065405 |
| H | 16.994419 | 8.439703  | 15.468924 |
| H | 18.657103 | 7.769510  | 15.522439 |
| C | 22.761557 | 14.679439 | 12.965678 |
| H | 23.651270 | 15.143329 | 12.524291 |
| H | 22.051796 | 15.448853 | 13.281261 |
| C | 18.937956 | 7.378598  | 12.070169 |
| H | 18.407797 | 7.643312  | 12.988906 |
| H | 18.222218 | 6.967692  | 11.347605 |
| C | 15.301921 | 17.758764 | 9.148813  |
| H | 15.838155 | 18.019773 | 10.068250 |
| H | 15.546906 | 18.470514 | 8.352277  |



|   |           |           |           |
|---|-----------|-----------|-----------|
| C | 13.143521 | 8.341084  | 12.394769 |
| C | 19.533348 | 14.223827 | 17.736824 |
| H | 18.942490 | 15.088560 | 18.059607 |
| H | 18.900236 | 13.328952 | 17.736156 |
| C | 23.794846 | 10.997853 | 14.150313 |
| H | 23.646814 | 11.647226 | 13.281060 |
| H | 24.382530 | 11.515948 | 14.916521 |
| C | 8.715270  | 11.683628 | 16.554770 |
| H | 7.622281  | 11.652390 | 16.485405 |
| H | 9.161928  | 11.114331 | 15.734439 |
| C | 14.115678 | 8.732956  | 16.385368 |
| H | 14.465135 | 8.188422  | 15.500100 |
| H | 14.895426 | 9.424494  | 16.726152 |
| C | 12.120371 | 15.469162 | 8.856604  |
| H | 12.090385 | 14.414393 | 9.149170  |
| H | 11.295988 | 15.694751 | 8.170289  |
| C | 17.827396 | 7.111624  | 8.219864  |
| H | 18.229160 | 7.083139  | 7.200374  |
| H | 18.639280 | 7.312800  | 8.926747  |
| C | 18.388744 | 17.883808 | 16.497290 |
| H | 18.042965 | 18.116310 | 15.484151 |
| H | 18.655458 | 18.806662 | 17.025763 |
| C | 13.989127 | 12.483806 | 7.378638  |
| H | 13.035242 | 12.478380 | 6.840352  |
| H | 14.146325 | 13.452379 | 7.861878  |
| C | 9.949980  | 10.459110 | 12.308299 |
| H | 17.219051 | 13.223721 | 20.364830 |
| H | 20.829556 | 11.098480 | 9.293952  |
| H | 21.974302 | 15.517821 | 6.850911  |
| H | 6.065226  | 15.860331 | 13.065938 |
| H | 9.500299  | 19.843372 | 13.503362 |

|    |           |           |           |
|----|-----------|-----------|-----------|
| H  | 12.166032 | 10.462104 | 21.284431 |
| H  | 17.694674 | 7.884108  | 17.029139 |
| H  | 23.044888 | 14.077897 | 13.839199 |
| H  | 19.725706 | 6.646636  | 12.280767 |
| H  | 14.222840 | 17.767763 | 9.340555  |
| H  | 12.855118 | 9.164119  | 11.731405 |
| H  | 12.863015 | 7.380318  | 11.947339 |
| H  | 12.654117 | 8.462481  | 13.367772 |
| H  | 20.388983 | 14.079488 | 18.405664 |
| H  | 24.312050 | 10.081625 | 13.843808 |
| H  | 9.043672  | 11.264793 | 17.513214 |
| H  | 13.863731 | 8.025445  | 17.182898 |
| H  | 13.079471 | 15.687669 | 8.372393  |
| H  | 17.345913 | 6.155541  | 8.454977  |
| H  | 19.259237 | 17.218088 | 16.448606 |
| H  | 14.812773 | 12.284404 | 6.683016  |
| H  | 9.063786  | 10.670941 | 12.918380 |
| H  | 9.708394  | 9.697145  | 11.558702 |
| H  | 10.765105 | 10.115372 | 12.951440 |
| H  | 13.012357 | 20.343927 | 12.515286 |
| C  | 13.944298 | 19.896957 | 12.150470 |
| H  | 14.497243 | 20.637569 | 11.561162 |
| H  | 13.718246 | 19.018909 | 11.538353 |
| S  | 14.937002 | 19.457273 | 13.629275 |
| Au | 16.898508 | 18.487030 | 12.795664 |
| S  | 18.934950 | 17.832813 | 11.852277 |
| H  | 20.256252 | 19.030798 | 13.489329 |
| C  | 20.200092 | 17.983854 | 13.169500 |
| H  | 19.972351 | 17.337027 | 14.022707 |
| H  | 21.156462 | 17.686272 | 12.723145 |
| C  | 12.108799 | 19.618462 | 19.672132 |

|   |           |           |           |
|---|-----------|-----------|-----------|
| C | 10.947705 | 18.848488 | 19.126797 |
| C | 13.176605 | 20.150185 | 18.921120 |
| C | 10.963415 | 17.455765 | 18.876135 |
| C | 12.072123 | 19.912439 | 21.050730 |
| C | 9.725852  | 19.532642 | 18.997713 |
| C | 14.147770 | 20.949747 | 19.550955 |
| C | 9.779730  | 16.804691 | 18.495470 |
| C | 13.041863 | 20.694353 | 21.671003 |
| C | 8.556888  | 18.881424 | 18.615044 |
| C | 14.087460 | 21.222763 | 20.911198 |
| C | 8.587422  | 17.508101 | 18.363798 |
| H | 11.248911 | 19.505571 | 21.639244 |
| H | 9.711551  | 20.602774 | 19.209778 |
| H | 14.957489 | 21.356020 | 18.944523 |
| H | 9.804688  | 15.731730 | 18.301641 |
| H | 12.973372 | 20.896095 | 22.739164 |
| H | 7.630216  | 19.446390 | 18.517773 |
| H | 14.853768 | 21.848452 | 21.369478 |
| H | 7.684263  | 16.974714 | 18.063261 |

## Structure of A-Au38

158

|    |           |           |           |
|----|-----------|-----------|-----------|
| Au | 13.896201 | 16.760048 | 12.510293 |
| Au | 14.527935 | 15.120511 | 14.806778 |
| Au | 13.395752 | 12.590680 | 14.186202 |
| Au | 15.860490 | 12.919143 | 16.028131 |
| Au | 18.578419 | 13.841458 | 12.156336 |
| Au | 11.891512 | 15.102355 | 13.616372 |
| Au | 15.976066 | 13.220635 | 13.172285 |
| Au | 13.683771 | 14.009797 | 11.667631 |
| Au | 11.886733 | 15.923414 | 10.608655 |
| Au | 12.921713 | 17.410587 | 15.126875 |
| Au | 17.404009 | 15.088950 | 14.721616 |
| Au | 16.540491 | 15.806527 | 12.078251 |
| Au | 16.211512 | 13.501942 | 10.337954 |
| Au | 17.307997 | 11.194383 | 11.721824 |
| Au | 15.903077 | 17.606663 | 14.276655 |
| Au | 15.925708 | 18.486185 | 11.415132 |
| Au | 15.613773 | 10.687118 | 14.323850 |
| Au | 14.178988 | 15.405711 | 17.787268 |
| Au | 11.289327 | 17.801062 | 12.681654 |
| Au | 18.280167 | 12.213279 | 14.486676 |
| Au | 14.704036 | 16.014603 | 9.881038  |
| Au | 11.197754 | 19.999409 | 15.206813 |
| Au | 14.441350 | 11.321787 | 11.660566 |
| Au | 13.681725 | 10.609889 | 16.891397 |
| Au | 13.297928 | 18.596436 | 10.476954 |
| Au | 14.599727 | 19.925810 | 16.309317 |
| Au | 9.060175  | 15.699148 | 11.993657 |

|    |           |           |           |
|----|-----------|-----------|-----------|
| Au | 17.282656 | 10.388785 | 17.105040 |
| Au | 13.807019 | 19.476130 | 13.322475 |
| Au | 14.889784 | 21.397249 | 10.869521 |
| Au | 11.875745 | 12.591028 | 9.718369  |
| Au | 15.592006 | 8.474508  | 11.879834 |
| Au | 16.197226 | 10.486835 | 8.916617  |
| Au | 20.611578 | 14.320571 | 14.526153 |
| Au | 15.597313 | 18.915867 | 8.311616  |
| Au | 10.078263 | 18.306742 | 9.786657  |
| Au | 20.525623 | 11.401417 | 12.497498 |
| Au | 19.084564 | 17.083017 | 11.003439 |
| S  | 16.730639 | 19.021805 | 16.050474 |
| S  | 12.556345 | 20.917709 | 16.875257 |
| S  | 15.511027 | 16.658550 | 7.695649  |
| S  | 12.654580 | 17.170792 | 17.528044 |
| S  | 16.411772 | 12.653862 | 8.078879  |
| S  | 11.876045 | 11.568752 | 15.758739 |
| S  | 12.635453 | 10.454879 | 10.311502 |
| S  | 15.626540 | 13.652781 | 18.323889 |
| S  | 19.372702 | 10.982689 | 16.246458 |
| S  | 9.627406  | 14.271044 | 13.750077 |
| S  | 22.090538 | 12.895943 | 13.397765 |
| S  | 8.213774  | 16.954126 | 10.207838 |
| S  | 9.644439  | 19.276260 | 13.621071 |
| S  | 10.844554 | 14.530951 | 8.916759  |
| S  | 11.754436 | 19.769148 | 9.072299  |
| S  | 16.091034 | 8.247646  | 9.600121  |
| S  | 15.181970 | 8.341188  | 14.178293 |
| S  | 15.352660 | 9.484953  | 18.078783 |
| S  | 15.912480 | 21.197374 | 8.763591  |
| S  | 20.276646 | 15.067685 | 10.942764 |

|   |           |           |           |
|---|-----------|-----------|-----------|
| S | 13.783792 | 21.842371 | 12.879328 |
| S | 18.178579 | 19.235634 | 10.942410 |
| S | 19.427044 | 15.939820 | 15.720341 |
| C | 11.457980 | 9.724259  | 11.510018 |
| C | 12.057615 | 22.202600 | 12.362792 |
| C | 12.731709 | 22.680027 | 16.404743 |
| C | 16.638205 | 7.421804  | 14.811735 |
| C | 22.934862 | 11.967685 | 14.736857 |
| S | 19.197357 | 9.704705  | 11.597009 |
| C | 20.010096 | 9.418800  | 15.528393 |
| C | 14.570029 | 7.567911  | 8.836704  |
| C | 11.664061 | 15.003548 | 7.345815  |
| C | 8.517974  | 18.186935 | 14.577097 |
| C | 12.113851 | 19.209778 | 7.361629  |
| C | 16.924238 | 17.972460 | 17.540632 |
| C | 17.285866 | 16.207184 | 7.633087  |
| C | 9.618353  | 12.611034 | 12.968724 |
| C | 6.945709  | 18.082676 | 10.903670 |
| C | 19.722965 | 9.543772  | 9.847651  |
| C | 14.814633 | 12.997481 | 7.243305  |
| C | 15.294907 | 10.153446 | 19.785191 |
| C | 19.858786 | 17.491188 | 14.844226 |
| C | 14.767110 | 22.120953 | 7.664610  |
| C | 10.969239 | 16.497347 | 17.768280 |
| C | 11.305280 | 12.925347 | 16.852386 |
| C | 18.689005 | 20.105354 | 12.472023 |
| C | 20.181854 | 14.411790 | 9.231456  |
| C | 17.259502 | 14.365855 | 18.750195 |
| H | 10.484401 | 9.598491  | 11.023802 |
| H | 11.868252 | 8.746428  | 11.790359 |
| H | 11.357161 | 10.344384 | 12.405404 |

|   |           |           |           |
|---|-----------|-----------|-----------|
| H | 12.034210 | 23.198631 | 11.904104 |
| H | 11.678771 | 21.454161 | 11.659711 |
| H | 11.442023 | 22.192106 | 13.272486 |
| H | 11.749464 | 23.156820 | 16.505207 |
| H | 13.445263 | 23.139711 | 17.099173 |
| H | 13.104399 | 22.779884 | 15.378672 |
| H | 16.463818 | 6.355054  | 14.632979 |
| H | 17.553688 | 7.736343  | 14.304492 |
| H | 16.719326 | 7.615489  | 15.886812 |
| H | 23.461082 | 11.117162 | 14.287451 |
| H | 23.657850 | 12.651233 | 15.198618 |
| H | 22.224915 | 11.619905 | 15.494813 |
| H | 20.899105 | 9.661759  | 14.934644 |
| H | 20.278023 | 8.746000  | 16.350702 |
| H | 19.272625 | 8.943248  | 14.877812 |
| H | 14.715730 | 7.541451  | 7.750532  |
| H | 14.438058 | 6.548503  | 9.217961  |
| H | 13.701386 | 8.187893  | 9.084876  |
| H | 11.548571 | 14.185772 | 6.626096  |
| H | 11.140215 | 15.893786 | 6.976544  |
| H | 12.722852 | 15.236199 | 7.493389  |
| H | 7.896073  | 17.634409 | 13.861456 |
| H | 9.077652  | 17.473555 | 15.189267 |
| H | 7.890421  | 18.823181 | 15.210633 |
| H | 11.308390 | 19.563984 | 6.708800  |
| H | 13.072498 | 19.648663 | 7.058848  |
| H | 12.194148 | 18.121674 | 7.306543  |
| H | 17.879274 | 17.441704 | 17.450312 |
| H | 16.932467 | 18.617046 | 18.427309 |
| H | 16.108566 | 17.241474 | 17.618994 |
| H | 17.747681 | 16.737272 | 6.792496  |

|   |           |           |           |
|---|-----------|-----------|-----------|
| H | 17.792078 | 16.470207 | 8.570272  |
| H | 17.348223 | 15.123786 | 7.474868  |
| H | 8.591962  | 12.368463 | 12.670788 |
| H | 10.280445 | 12.586143 | 12.094984 |
| H | 9.969726  | 11.897452 | 13.723009 |
| H | 6.564076  | 18.702381 | 10.083030 |
| H | 6.134772  | 17.464590 | 11.305788 |
| H | 7.360358  | 18.724737 | 11.687938 |
| H | 19.053022 | 8.825354  | 9.360135  |
| H | 19.668938 | 10.505332 | 9.330435  |
| H | 20.750816 | 9.164331  | 9.840076  |
| H | 14.727406 | 12.337228 | 6.373259  |
| H | 13.965796 | 12.844038 | 7.921144  |
| H | 14.840170 | 14.044436 | 6.919387  |
| H | 14.355701 | 9.820287  | 20.242262 |
| H | 16.144812 | 9.733521  | 20.335257 |
| H | 15.346789 | 11.247616 | 19.782923 |
| H | 20.917786 | 17.703419 | 15.024140 |
| H | 19.669645 | 17.399385 | 13.767487 |
| H | 19.238855 | 18.293354 | 15.261027 |
| H | 15.042214 | 21.900801 | 6.626841  |
| H | 13.722132 | 21.850473 | 7.847605  |
| H | 14.909153 | 23.188862 | 7.864682  |
| H | 10.281267 | 17.343533 | 17.654467 |
| H | 10.732783 | 15.725690 | 17.028862 |
| H | 10.887836 | 16.089134 | 18.781630 |
| H | 10.549994 | 13.493029 | 16.296391 |
| H | 10.856167 | 12.483825 | 17.748520 |
| H | 12.134987 | 13.585854 | 17.130737 |
| H | 19.776773 | 20.230318 | 12.460499 |
| H | 18.201458 | 21.086523 | 12.455522 |



|   |           |           |           |
|---|-----------|-----------|-----------|
| H | 18.375320 | 19.559816 | 13.365387 |
| H | 20.699444 | 15.103038 | 8.556350  |
| H | 20.698656 | 13.444787 | 9.242920  |
| H | 19.146935 | 14.269998 | 8.909254  |
| H | 17.940315 | 13.519779 | 18.901934 |
| H | 17.647108 | 15.001952 | 17.949488 |
| H | 17.158089 | 14.938174 | 19.678890 |

## Structure of C-Au38

158

|    |           |           |           |
|----|-----------|-----------|-----------|
| Au | 15.717066 | 16.298286 | 12.561109 |
| Au | 15.069592 | 14.695439 | 14.819645 |
| Au | 16.203915 | 12.181561 | 14.176603 |
| Au | 13.801299 | 12.478841 | 16.067631 |
| Au | 11.004689 | 13.394348 | 12.189775 |
| Au | 17.761198 | 14.704721 | 13.678841 |
| Au | 13.619209 | 12.800105 | 13.198214 |
| Au | 15.926339 | 13.598167 | 11.684287 |
| Au | 17.714300 | 15.522355 | 10.621639 |
| Au | 16.614798 | 16.998865 | 15.200663 |
| Au | 12.196293 | 14.673882 | 14.734169 |
| Au | 13.034390 | 15.355974 | 12.086716 |
| Au | 13.391812 | 13.022861 | 10.398724 |
| Au | 12.297378 | 10.706644 | 11.802957 |
| Au | 13.687166 | 17.193920 | 14.301905 |
| Au | 13.696830 | 18.012667 | 11.482630 |
| Au | 13.992695 | 10.261060 | 14.330131 |
| Au | 15.421410 | 15.002873 | 17.794857 |
| Au | 18.310436 | 17.394571 | 12.695635 |
| Au | 11.323526 | 11.811616 | 14.517097 |
| Au | 14.890777 | 15.607999 | 9.906794  |
| Au | 18.401049 | 19.597013 | 15.208895 |
| Au | 15.110078 | 10.898528 | 11.608747 |
| Au | 15.952741 | 10.150238 | 16.865934 |
| Au | 16.309124 | 18.183992 | 10.499048 |
| Au | 14.992638 | 19.528688 | 16.321121 |
| Au | 20.602770 | 15.297212 | 12.079543 |

|    |           |           |           |
|----|-----------|-----------|-----------|
| Au | 12.393610 | 9.906867  | 17.096859 |
| Au | 15.801447 | 19.011112 | 13.390335 |
| Au | 14.784106 | 20.913658 | 10.874840 |
| Au | 17.723326 | 12.198436 | 9.713302  |
| Au | 13.998534 | 8.001250  | 11.797649 |
| Au | 13.399558 | 10.075426 | 8.913113  |
| Au | 8.986010  | 13.919508 | 14.529517 |
| Au | 14.006680 | 18.512444 | 8.318183  |
| Au | 19.528671 | 17.882689 | 9.795937  |
| Au | 9.066974  | 10.999199 | 12.516710 |
| Au | 10.587942 | 16.606281 | 11.000860 |
| S  | 12.854364 | 18.619164 | 16.073498 |
| S  | 17.044420 | 20.509907 | 16.881973 |
| S  | 14.105596 | 16.253948 | 7.715558  |
| S  | 16.949291 | 16.775536 | 17.585865 |
| S  | 13.167746 | 12.260759 | 8.119165  |
| S  | 17.729254 | 11.149148 | 15.731627 |
| S  | 16.960457 | 10.066274 | 10.303316 |
| S  | 14.010416 | 13.223580 | 18.351452 |
| S  | 10.295570 | 10.549282 | 16.282780 |
| S  | 20.023952 | 13.874630 | 13.838449 |
| S  | 7.501055  | 12.494018 | 13.415130 |
| S  | 21.381573 | 16.527927 | 10.250989 |
| S  | 19.964043 | 18.864799 | 13.636225 |
| S  | 18.765566 | 14.143429 | 8.926497  |
| S  | 17.865602 | 19.354338 | 9.084668  |
| S  | 13.516262 | 7.809413  | 9.509746  |
| S  | 14.400581 | 7.903694  | 14.099049 |
| S  | 14.310898 | 9.002236  | 18.083181 |
| S  | 13.706630 | 20.790171 | 8.795017  |
| S  | 9.347739  | 14.621712 | 10.918513 |

|   |           |           |           |
|---|-----------|-----------|-----------|
| S | 15.847452 | 21.370243 | 12.897446 |
| S | 11.471244 | 18.775753 | 10.939040 |
| S | 10.172434 | 15.535556 | 15.724485 |
| C | 18.142921 | 9.357429  | 11.509487 |
| C | 17.573814 | 21.731890 | 12.388767 |
| C | 16.881977 | 22.278528 | 16.428530 |
| C | 12.963891 | 6.968370  | 14.751930 |
| C | 6.699419  | 11.566690 | 14.783481 |
| S | 10.381868 | 9.278008  | 11.649663 |
| C | 9.623321  | 9.004782  | 15.552958 |
| C | 15.072800 | 7.204575  | 8.748679  |
| C | 17.938671 | 14.639996 | 7.367594  |
| C | 21.077276 | 17.790159 | 14.621752 |
| C | 17.493740 | 18.812872 | 7.370879  |
| C | 12.668625 | 17.574144 | 17.568932 |
| C | 12.333881 | 15.794193 | 7.627167  |
| C | 20.043112 | 12.230283 | 13.025909 |
| C | 22.655449 | 17.673126 | 10.907499 |
| C | 9.907063  | 9.118697  | 9.885964  |
| C | 14.753672 | 12.607559 | 7.268133  |
| C | 14.361657 | 9.716061  | 19.769129 |
| C | 9.735103  | 17.079350 | 14.842023 |
| C | 14.834157 | 21.717245 | 7.682367  |
| C | 18.634697 | 16.085958 | 17.796883 |
| C | 18.247362 | 12.503382 | 16.853231 |
| C | 10.940376 | 19.673038 | 12.444804 |
| C | 9.459245  | 13.949457 | 9.218265  |
| C | 12.363466 | 13.921852 | 18.748878 |
| H | 19.105400 | 9.202399  | 11.008668 |
| H | 17.727747 | 8.394962  | 11.832993 |
| H | 18.266609 | 10.009091 | 12.378957 |

|   |           |           |           |
|---|-----------|-----------|-----------|
| H | 17.586828 | 22.712454 | 11.900069 |
| H | 17.960651 | 20.967199 | 11.707827 |
| H | 18.186749 | 21.756582 | 13.298805 |
| H | 17.871344 | 22.741627 | 16.510378 |
| H | 16.192604 | 22.741856 | 17.143820 |
| H | 16.492661 | 22.391762 | 15.410667 |
| H | 13.131226 | 5.907540  | 14.533709 |
| H | 12.030038 | 7.298707  | 14.289468 |
| H | 12.919174 | 7.122591  | 15.836826 |
| H | 6.187228  | 10.695221 | 14.359200 |
| H | 5.967436  | 12.235345 | 15.253450 |
| H | 7.433805  | 11.250707 | 15.530816 |
| H | 8.703213  | 9.262236  | 15.014990 |
| H | 9.401031  | 8.306012  | 16.367104 |
| H | 10.326738 | 8.551625  | 14.850958 |
| H | 14.936940 | 7.189032  | 7.661332  |
| H | 15.253614 | 6.187898  | 9.116364  |
| H | 15.911014 | 7.858758  | 9.013508  |
| H | 18.054115 | 13.841867 | 6.625941  |
| H | 18.453411 | 15.542621 | 7.016443  |
| H | 16.879721 | 14.859319 | 7.529274  |
| H | 21.722820 | 17.243135 | 13.922457 |
| H | 20.514936 | 17.069965 | 15.222402 |
| H | 21.681614 | 18.436932 | 15.267378 |
| H | 18.294437 | 19.174965 | 6.715758  |
| H | 16.532942 | 19.256197 | 7.081137  |
| H | 17.413746 | 17.725094 | 7.306605  |
| H | 11.724103 | 17.026218 | 17.473307 |
| H | 12.639608 | 18.227650 | 18.448895 |
| H | 13.496177 | 16.858625 | 17.658745 |
| H | 11.880485 | 16.330076 | 6.785820  |

|   |           |           |           |
|---|-----------|-----------|-----------|
| H | 11.812903 | 16.046572 | 8.559147  |
| H | 12.277998 | 14.712059 | 7.459634  |
| H | 21.078026 | 11.987969 | 12.757108 |
| H | 19.413671 | 12.232809 | 12.128049 |
| H | 19.658842 | 11.500706 | 13.748500 |
| H | 23.028032 | 18.273060 | 10.069671 |
| H | 23.470385 | 17.066044 | 11.317200 |
| H | 22.246246 | 18.332401 | 11.680658 |
| H | 10.576437 | 8.377228  | 9.435019  |
| H | 10.000747 | 10.071114 | 9.354814  |
| H | 8.872607  | 8.760465  | 9.848273  |
| H | 14.837852 | 11.945366 | 6.398485  |
| H | 15.608552 | 12.458162 | 7.939870  |
| H | 14.724825 | 13.653533 | 6.941660  |
| H | 15.287111 | 9.373569  | 20.246424 |
| H | 13.495776 | 9.333885  | 20.321447 |
| H | 14.334952 | 10.810143 | 19.732260 |
| H | 8.676568  | 17.291536 | 15.026917 |
| H | 9.916484  | 16.981050 | 13.764544 |
| H | 10.355607 | 17.886396 | 15.249576 |
| H | 14.543633 | 21.497278 | 6.649324  |
| H | 15.882701 | 21.450073 | 7.847672  |
| H | 14.692690 | 22.784079 | 7.887065  |
| H | 19.330866 | 16.926762 | 17.686817 |
| H | 18.860472 | 15.319583 | 17.049437 |
| H | 18.723028 | 15.668221 | 18.805698 |
| H | 18.992931 | 13.099708 | 16.314917 |
| H | 18.693777 | 12.059178 | 17.749784 |
| H | 17.395861 | 13.138528 | 17.127947 |
| H | 9.854177  | 19.809502 | 12.413950 |
| H | 11.444394 | 20.646971 | 12.415992 |

|   |           |           |           |
|---|-----------|-----------|-----------|
| H | 11.234100 | 19.138445 | 13.352164 |
| H | 8.970104  | 14.645035 | 8.526507  |
| H | 8.920844  | 12.994163 | 9.228649  |
| H | 10.497952 | 13.782204 | 8.921472  |
| H | 11.687114 | 13.072530 | 18.902937 |
| H | 11.984620 | 14.540579 | 17.930901 |
| H | 12.443911 | 14.510780 | 19.668934 |

## References

1. D. Fabbri, G. Delogu and O. De Lucchi, *J. Org. Chem.*, 1993, **58**, 1748-1750.
2. H. Qian, Y. Zhu and R. Jin, *ACS Nano*, 2009, **3**, 3795-3803.
3. I. Dolamic, S. Knoppe, A. Dass and T. Bürgi, *Nat. Commun.*, 2012, **3**, 798.
4. S. Knoppe, R. Azoulay, A. Dass and T. Bürgi, *J. Am. Chem. Soc.*, 2012, **134**, 20302-20305.
5. J. Enkovaara, C. Rostgaard, J. J. Mortensen, J. Chen, M. Duřak, L. Ferrighi, J. Gavnholt, C. Glinsvad, V. Haikola, H. A. Hansen, H. H. Kristoffersen, M. Kuisma, A. H. Larsen, L. Lehtovaara, M. Ljungberg, O. Lopez-Acevedo, P. G. Moses, J. Ojanen, T. Olsen, V. Petzold, N. A. Romero, J. Stausholm-Møller, M. Strange, G. A. Tritsarlis, M. Vanin, M. Walter, B. Hammer, H. Häkkinen, G. K. H. Madsen, R. M. Nieminen, J. K. Nørskov, M. Puska, T. T. Rantala, J. Schiøtz, K. S. Thygesen and K. W. Jacobsen, *J. Phys.: Condens. Matter*, 2010, **22**, 253202.
6. J. P. Perdew, K. Burke and M. Ernzerhof, *Phys. Rev. Lett.*, 1996, **77**, 3865-3868.
7. J. P. Perdew, K. Burke and M. Ernzerhof, *Phys. Rev. Lett.*, 1997, **78**, 1396-1396.
8. A. Tkatchenko and M. Scheffler, *Phys. Rev. Lett.*, 2009, **102**, 073005.
9. G. Henkelman and H. Jónsson, *J. Chem. Phys.*, 2000, **113**, 9978-9985.
10. A. D. Becke, *Physical Review A*, 1988, **38**, 3098-3100.
11. C. Lee, W. Yang and R. G. Parr, *Physical Review B*, 1988, **37**, 785-789.
12. E. Makkonen, T. P. Rossi, A. H. Larsen, O. Lopez-Acevedo, P. Rinke, M. Kuisma and X. Chen, *arXiv: Chemical Physics*, 2020.
